# Supplementary material for: Identification of key miRNAs in the progression of hepatocellular carcinoma using an integrated bioinformatics approach
Source: PubMed Central journal article supplement (PMC7210814; doi:10.7717/peerj.9000), 2020-05-06

mRNAs in co-expression module

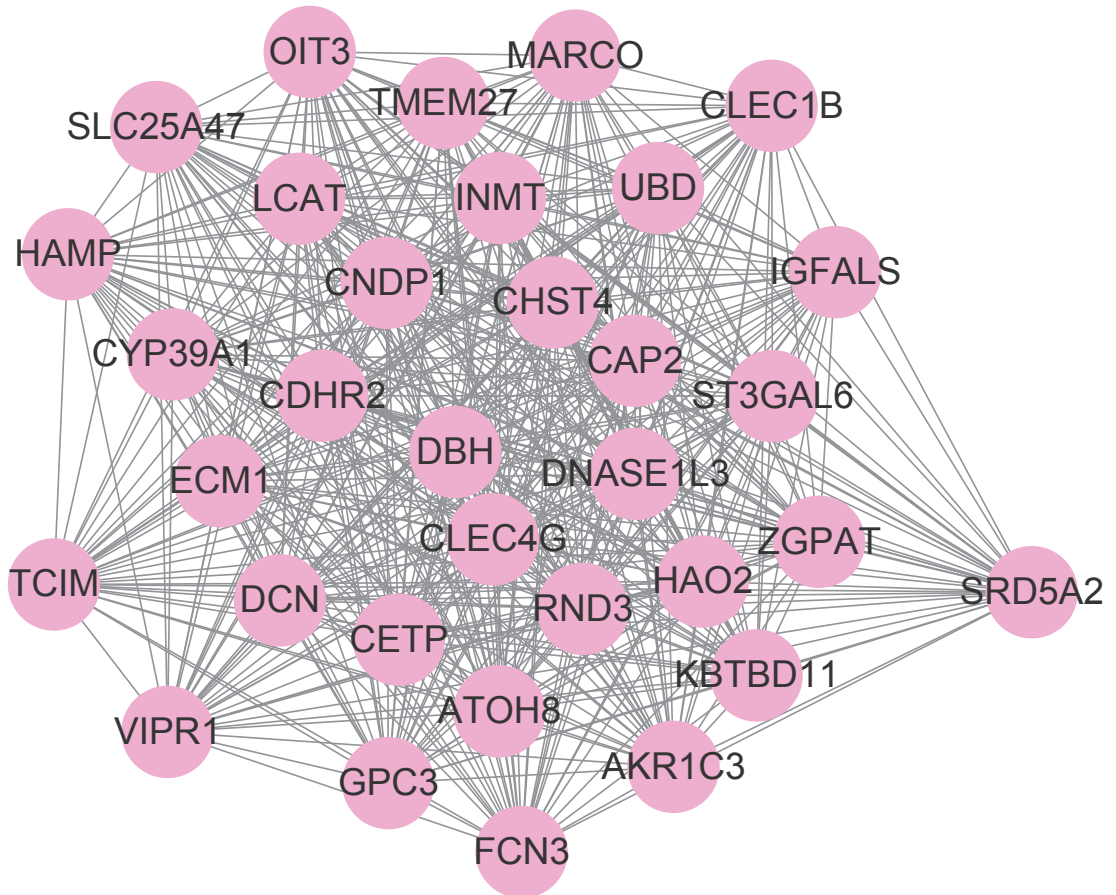

Supplement: peerj-08-9000-s001.pdf [file peerj-08-9000-s001.pdf]
