# Supplementary material for: Identification of key miRNAs in the progression of hepatocellular carcinoma using an integrated bioinformatics approach
Source: PubMed Central journal article supplement (PMC7210814; doi:10.7717/peerj.9000), 2020-05-06
Supplement: peerj-08-9000-s002.pdf [file peerj-08-9000-s002.pdf]

# EnrichmentGO

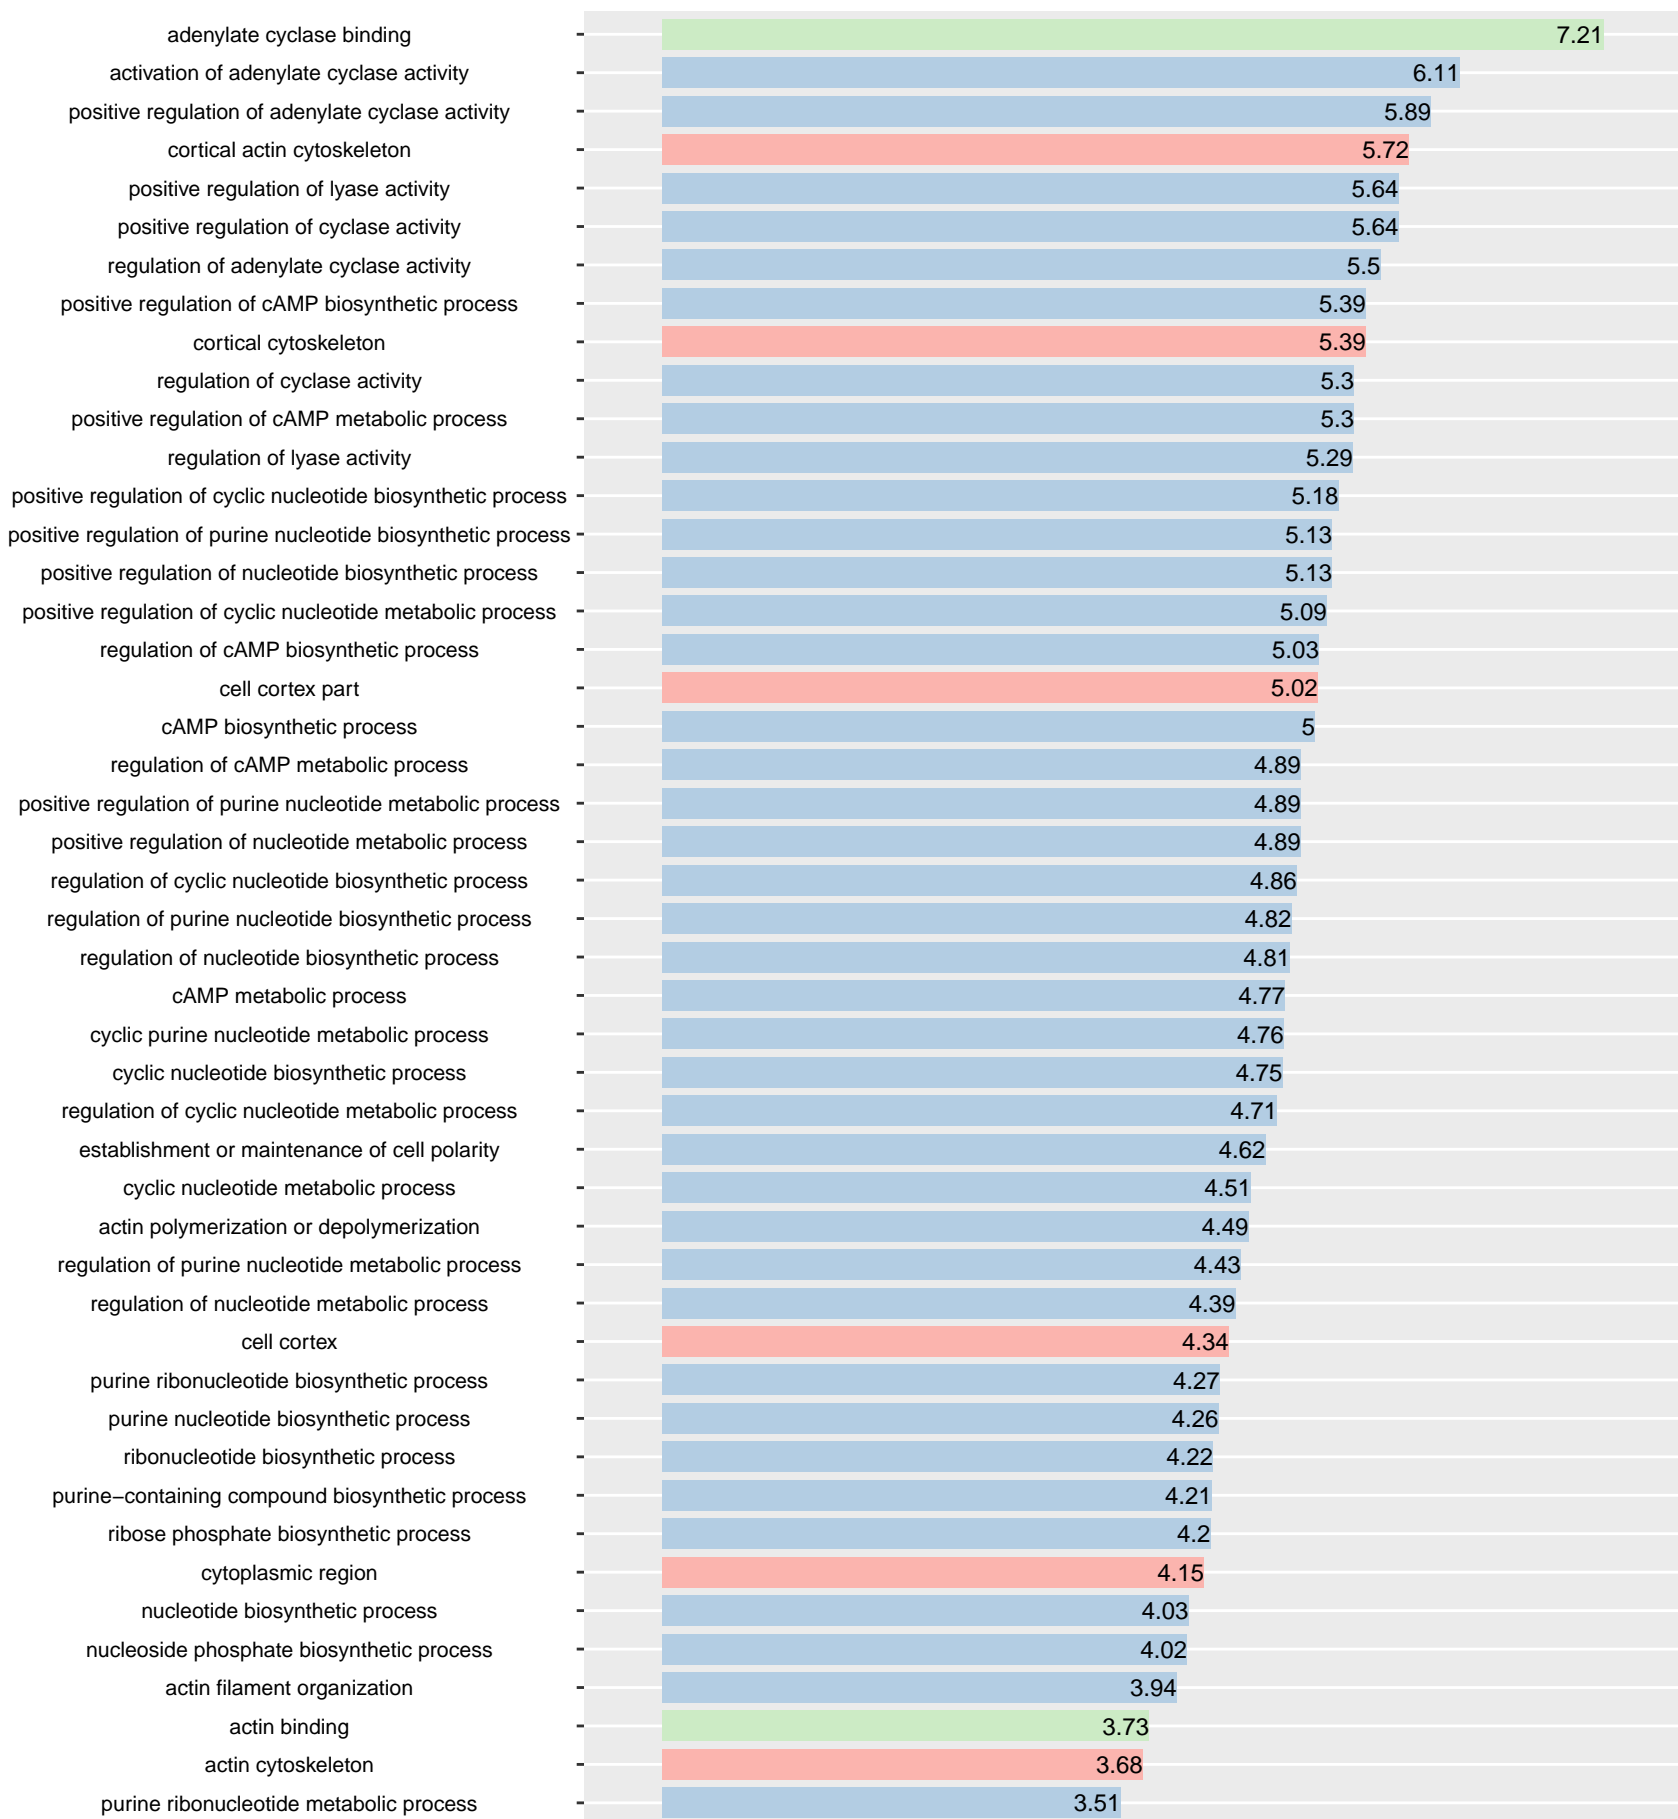

## GO Terms

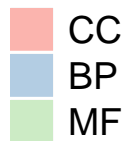

# EnrichmentGO

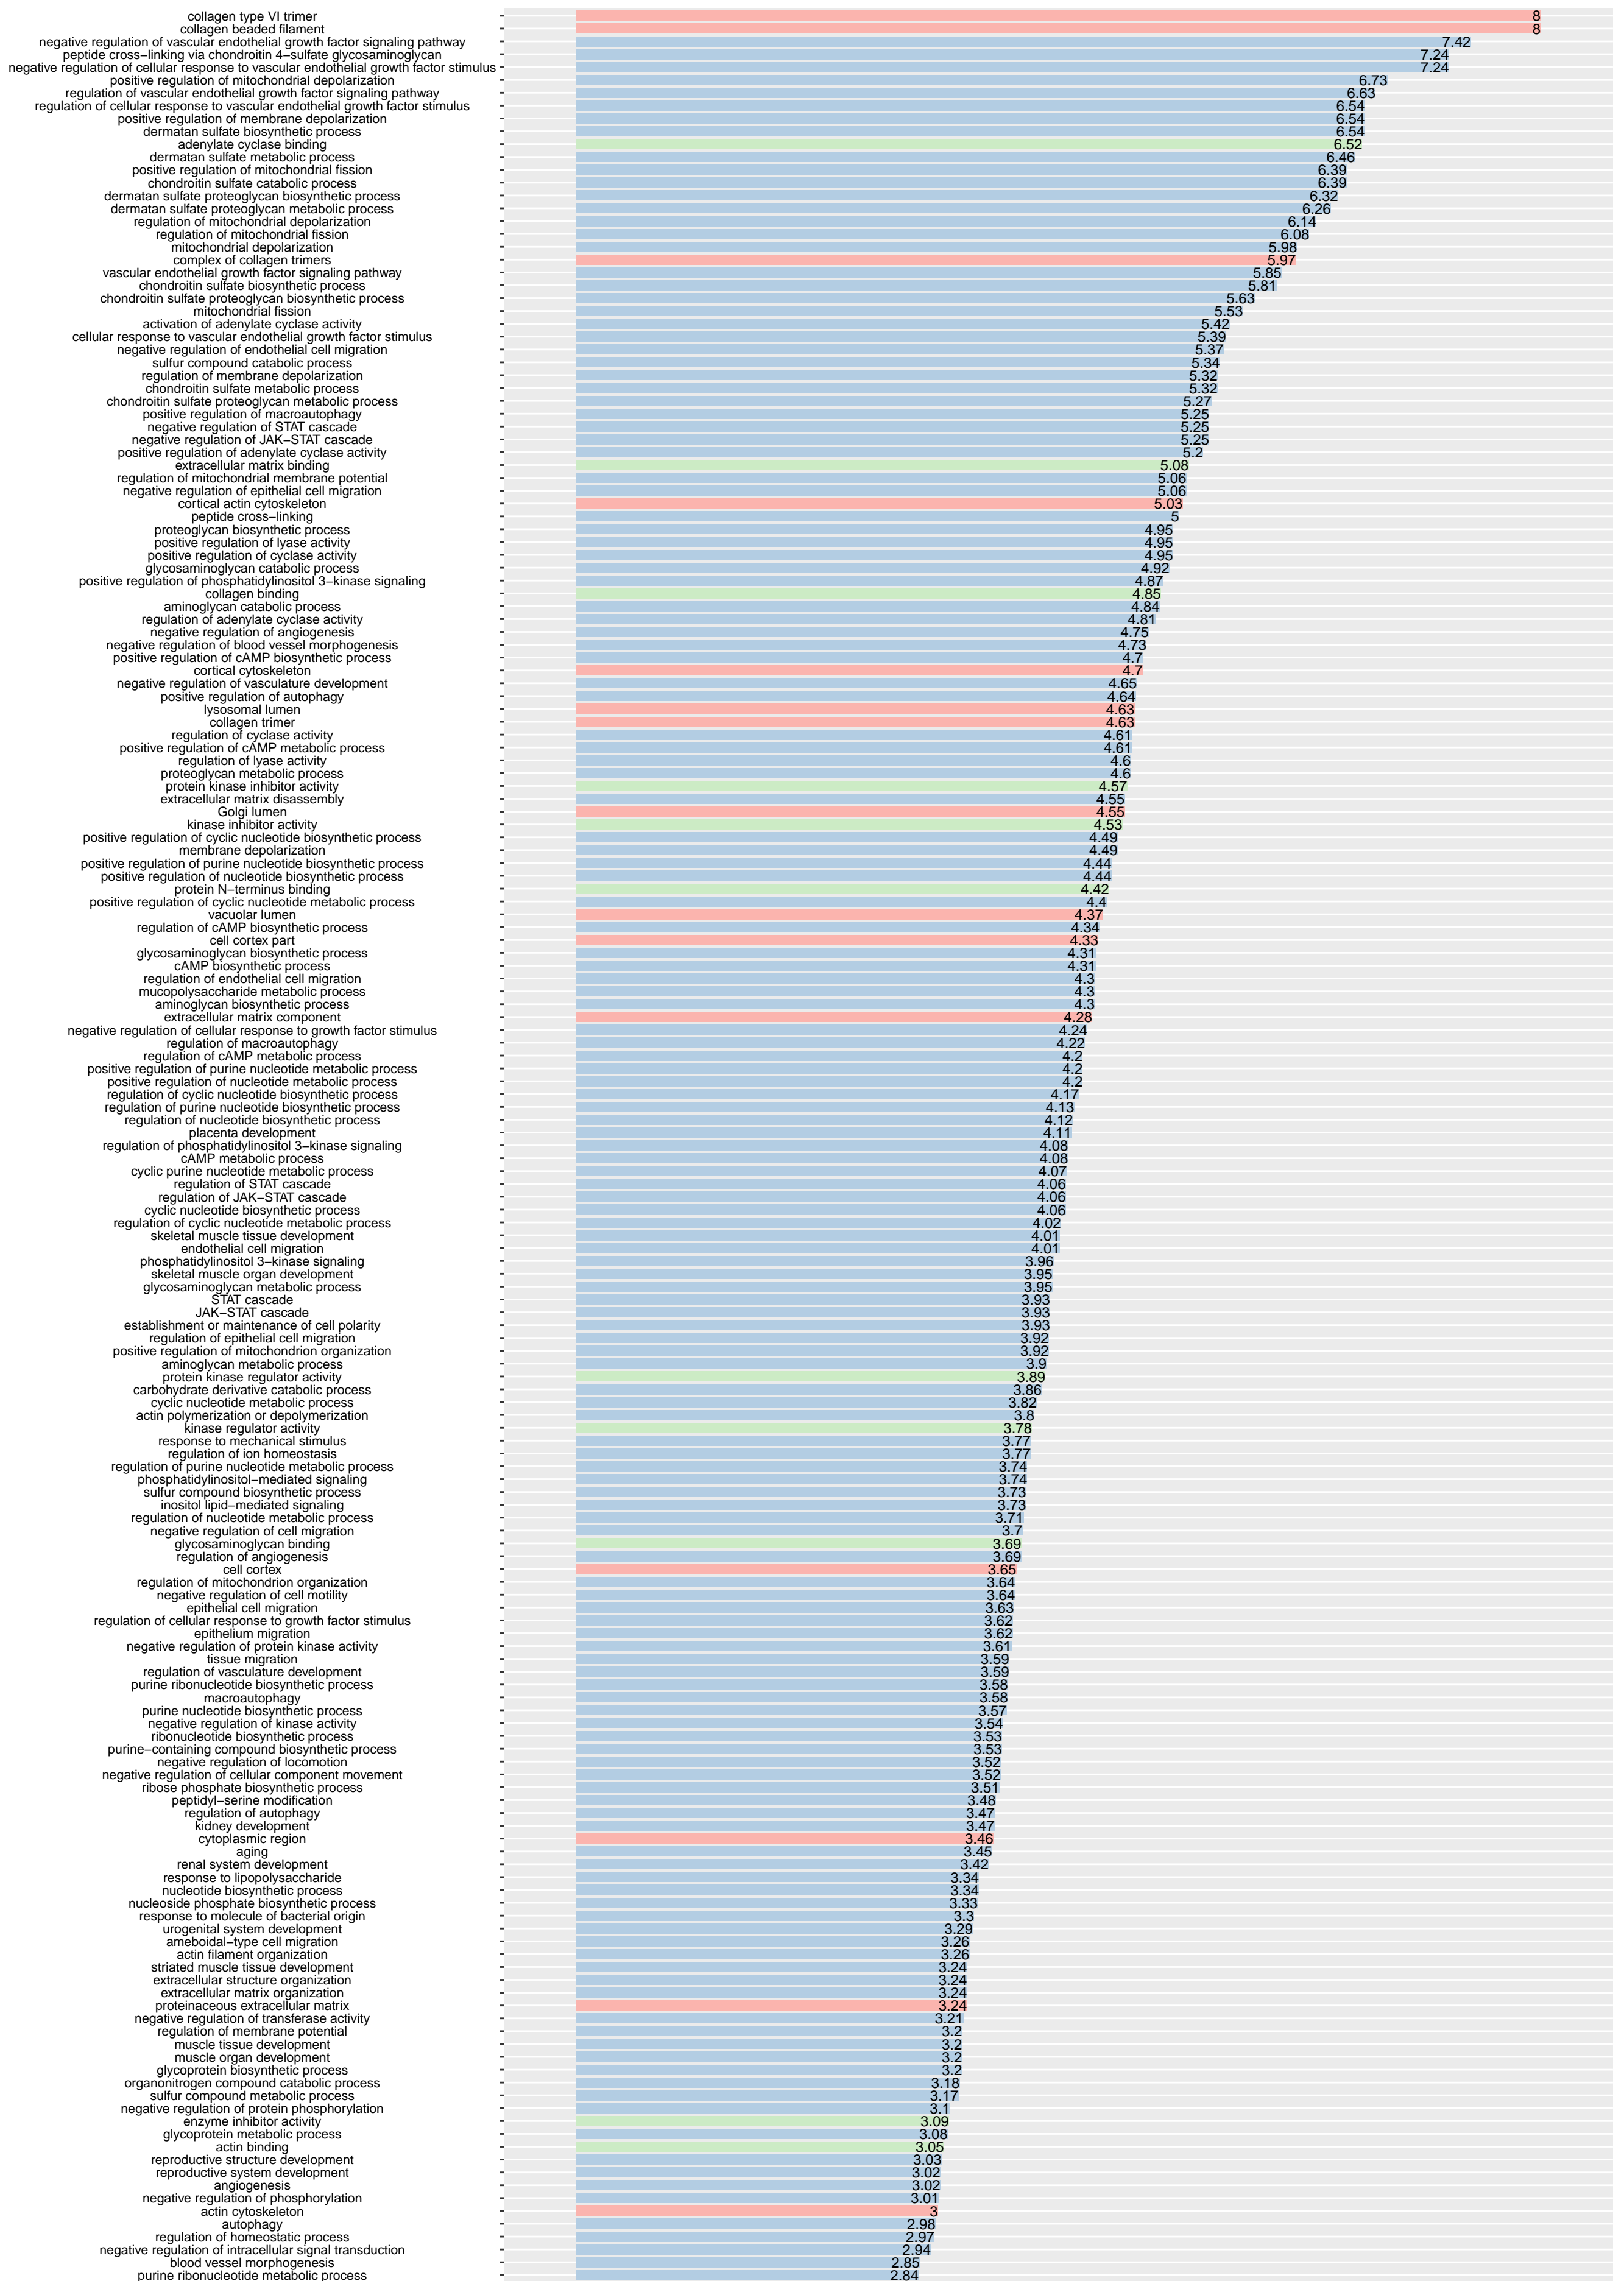

GO Terms

- CC
- BP
- MF

**EnrichmentGO**

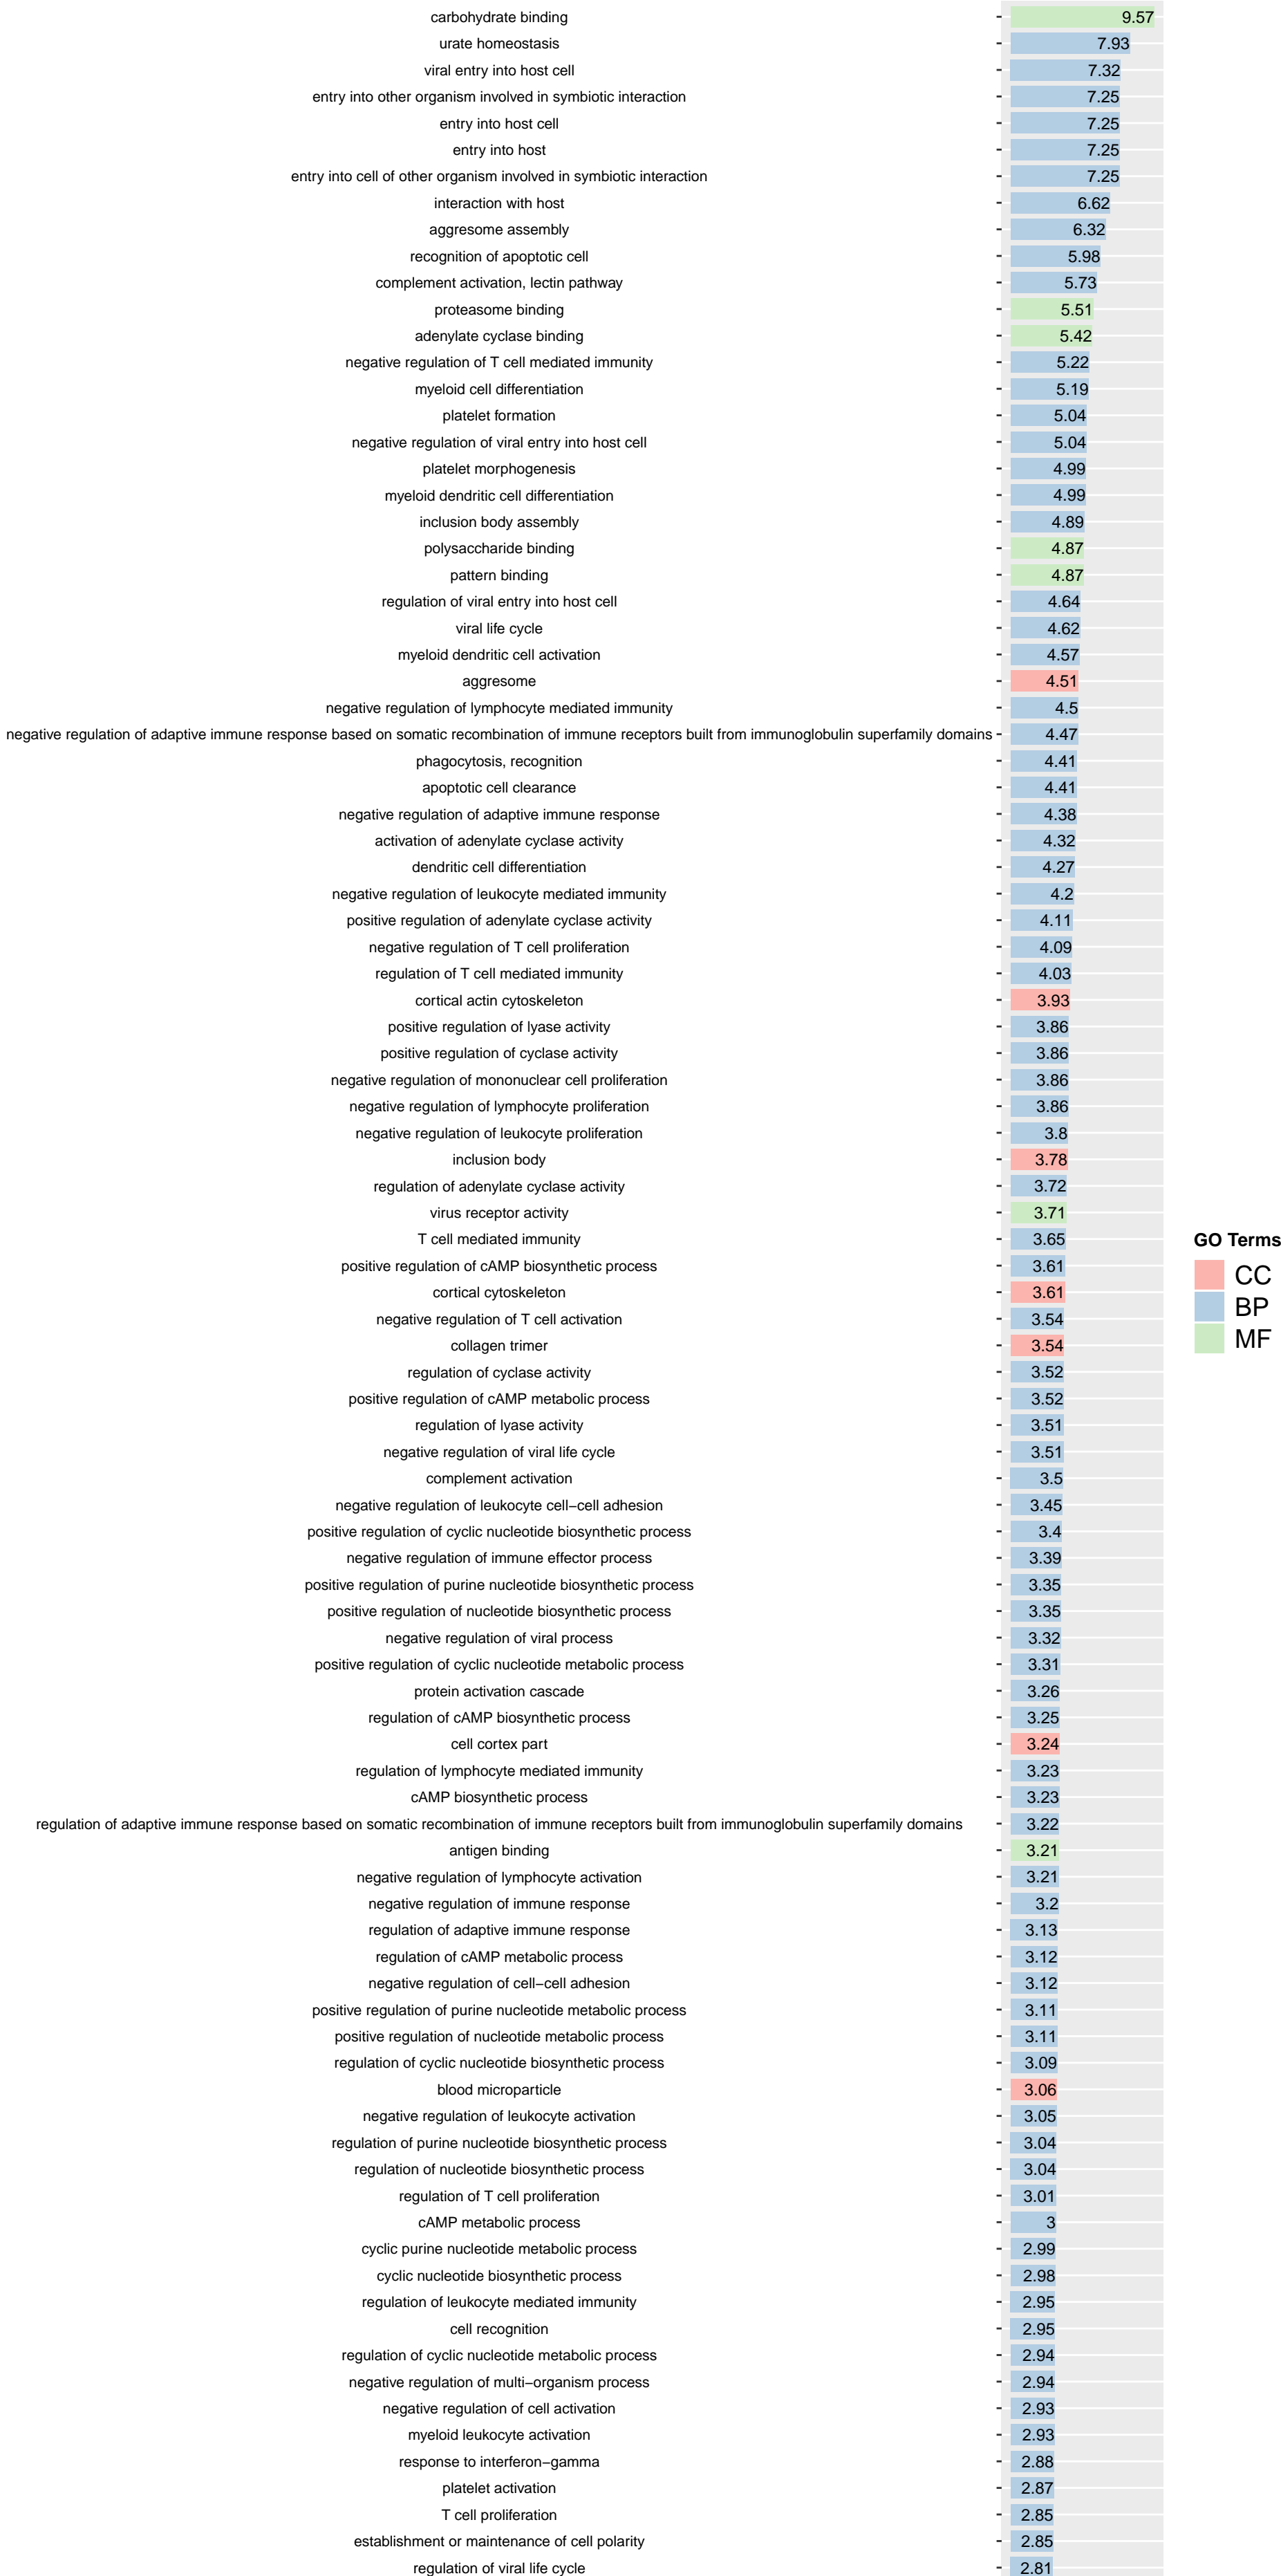

**GO Terms**

- CC
- BP
- MF

# EnrichmentGO

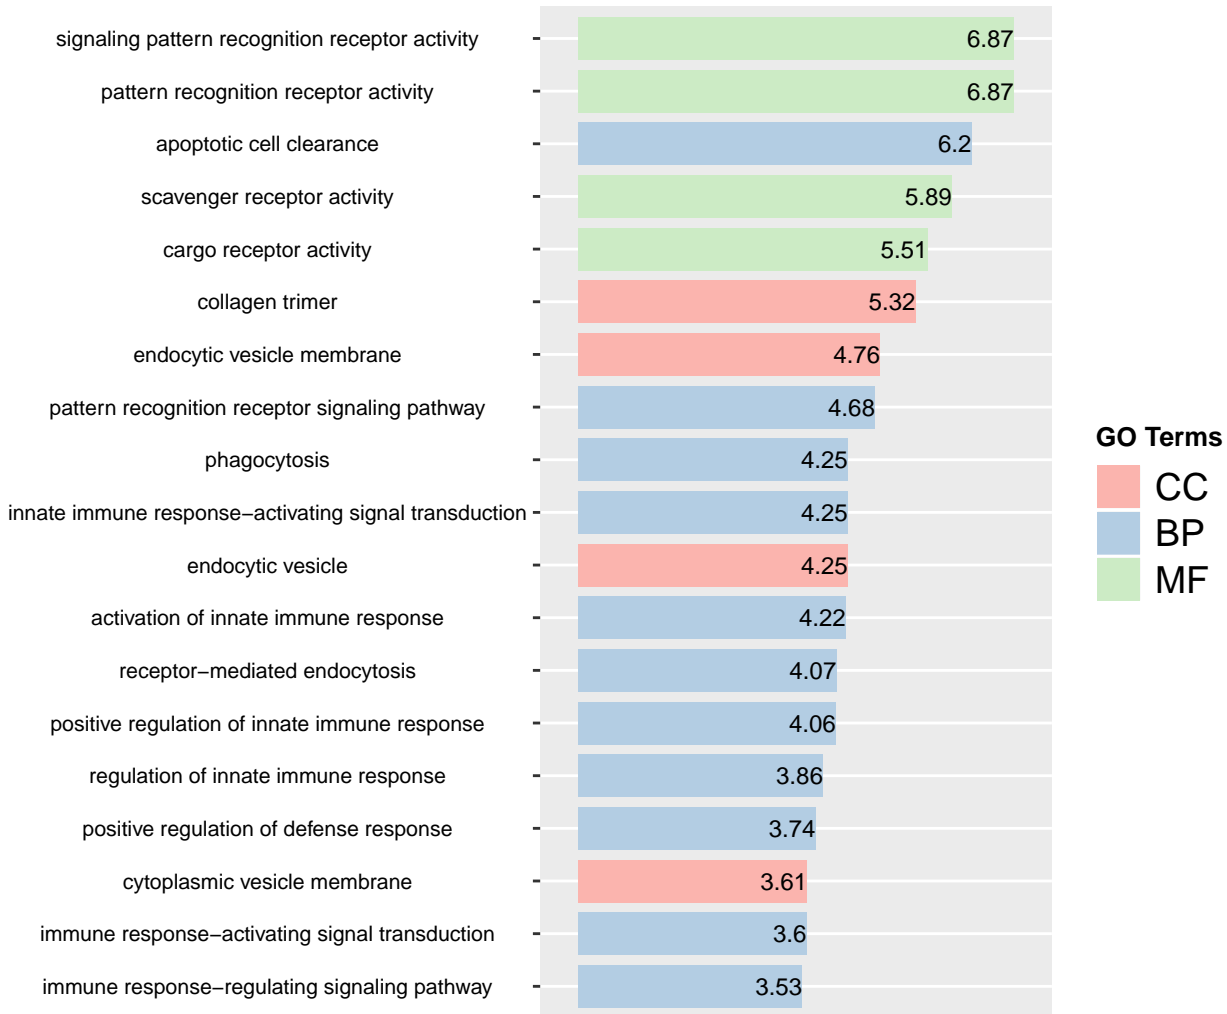

EnrichmentGO

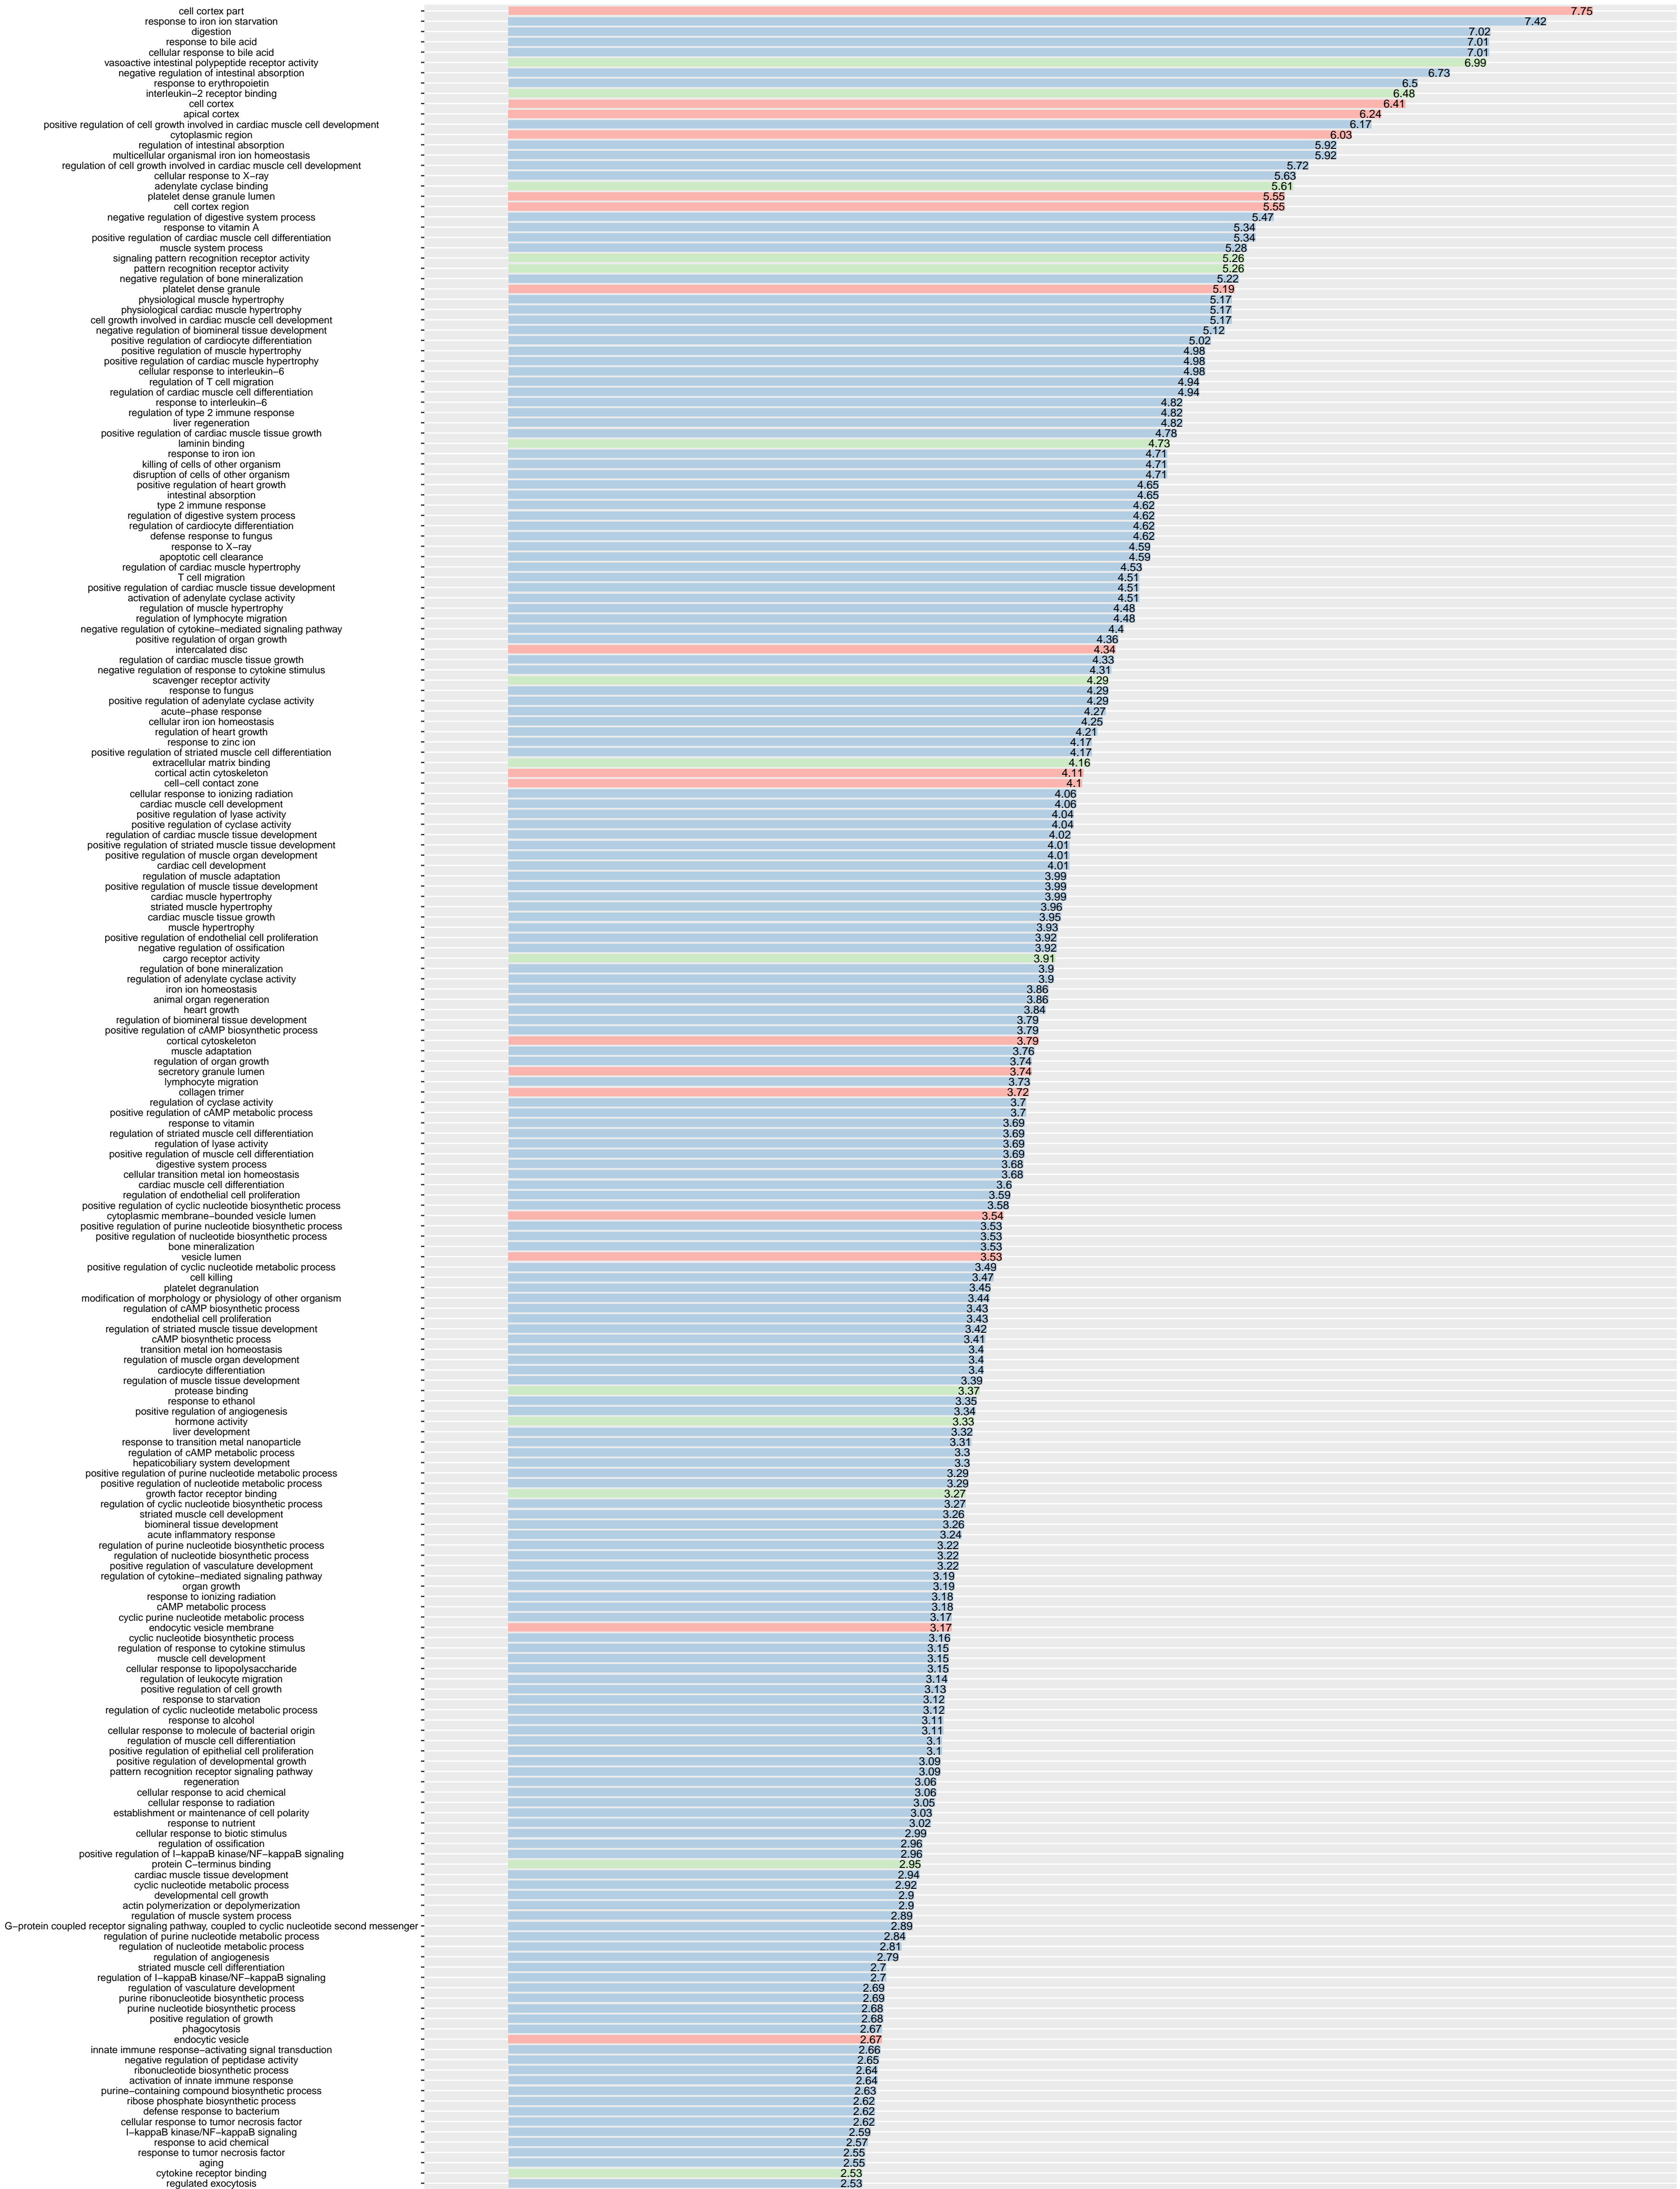

GO Terms  
■ CC  
■ BP  
■ MF

EnrichmentGO

|                                                                                                                                                                                |      |
|--------------------------------------------------------------------------------------------------------------------------------------------------------------------------------|------|
| chromaffin granule lumen                                                                                                                                                       | 7.4  |
| urate homeostasis                                                                                                                                                              | 7.32 |
| octopamine metabolic process                                                                                                                                                   | 7.32 |
| octopamine biosynthetic process                                                                                                                                                | 7.32 |
| sterol 5-alpha reductase activity                                                                                                                                              | 7.32 |
| dopamine beta-monoxygenase activity                                                                                                                                            | 7.3  |
| secretory granule lumen                                                                                                                                                        | 6.71 |
| response to iron ion starvation                                                                                                                                                | 6.63 |
| homiothermy                                                                                                                                                                    | 6.63 |
| ethanolamine-containing compound metabolic process                                                                                                                             | 6.63 |
| very-long-chain-(S)-2-hydroxy-acid oxidase activity                                                                                                                            | 6.61 |
| triglyceride binding                                                                                                                                                           | 6.61 |
| medium-chain-(S)-2-hydroxy-acid oxidase activity                                                                                                                               | 6.61 |
| long-chain-(S)-2-hydroxy-long-chain-acid oxidase activity                                                                                                                      | 6.61 |
| (S)-2-hydroxy-acid oxidase activity                                                                                                                                            | 6.61 |
| cytoplasmic membrane-bounded vesicle lumen                                                                                                                                     | 6.32 |
| vesicle lumen                                                                                                                                                                  | 6.3  |
| response to bile acid                                                                                                                                                          | 6.23 |
| phthalate metabolic process                                                                                                                                                    | 6.23 |
| cellular response to bile acid                                                                                                                                                 | 6.23 |
| steroid dehydrogenase activity, acting on the CH-CH group of donors                                                                                                            | 6.2  |
| oxidoreductase activity, acting on the CH-OH group of donors, oxygen as acceptor                                                                                               | 6.2  |
| cholestenone 5-alpha-reductase activity                                                                                                                                        | 6.2  |
| 3-oxo-5-alpha-steroid 4-dehydrogenase activity                                                                                                                                 | 6.2  |
| cell cortex part                                                                                                                                                               | 6.07 |
| negative regulation of intestinal absorption                                                                                                                                   | 5.94 |
| dibenzop-dioxin metabolic process                                                                                                                                              | 5.94 |
| biphenyl metabolic process                                                                                                                                                     | 5.94 |
| response to ethanol                                                                                                                                                            | 5.93 |
| triglyceride transport                                                                                                                                                         | 5.72 |
| response to erythropoietin                                                                                                                                                     | 5.72 |
| norepinephrine biosynthetic process                                                                                                                                            | 5.72 |
| dopamine catabolic process                                                                                                                                                     | 5.72 |
| acylglycerol transport                                                                                                                                                         | 5.72 |
| oxidoreductase activity, acting on paired donors, with incorporation or reduction of molecular oxygen, reduced ascorbate as one donor, and incorporation of one atom of oxygen | 5.69 |
| interleukin-2 receptor binding                                                                                                                                                 | 5.69 |
| enease reductase activity                                                                                                                                                      | 5.69 |
| chromaffin granule membrane                                                                                                                                                    | 5.61 |
| catecholamine catabolic process                                                                                                                                                | 5.53 |
| catechol-containing compound catabolic process                                                                                                                                 | 5.53 |
| response to alcohol                                                                                                                                                            | 5.45 |
| apical cortex                                                                                                                                                                  | 5.45 |
| positive regulation of cell growth involved in cardiac muscle cell development                                                                                                 | 5.38 |
| phenol-containing compound catabolic process                                                                                                                                   | 5.38 |
| metallopeptidase activity                                                                                                                                                      | 5.36 |
| chromaffin granule                                                                                                                                                             | 5.32 |
| cell body fiber                                                                                                                                                                | 5.32 |
| regulation of intestinal absorption                                                                                                                                            | 5.13 |
| phospholipid homeostasis                                                                                                                                                       | 5.13 |
| multicellular organismal iron ion homeostasis                                                                                                                                  | 5.13 |
| norepinephrine metabolic process                                                                                                                                               | 5.02 |
| behavioral response to ethanol                                                                                                                                                 | 5.02 |
| very-low-density lipoprotein particle remodeling                                                                                                                               | 4.93 |
| triglyceride-rich lipoprotein particle remodeling                                                                                                                              | 4.93 |
| regulation of cell growth involved in cardiac muscle cell development                                                                                                          | 4.93 |
| low-density lipoprotein particle remodeling                                                                                                                                    | 4.93 |
| androgen biosynthetic process                                                                                                                                                  | 4.93 |
| parental behavior                                                                                                                                                              | 4.84 |
| maternal behavior                                                                                                                                                              | 4.84 |
| cellular response to X-ray                                                                                                                                                     | 4.84 |
| adenylate cyclase binding                                                                                                                                                      | 4.82 |
| negative regulation of macrophage derived foam cell differentiation                                                                                                            | 4.76 |
| platelet dense granule lumen                                                                                                                                                   | 4.76 |
| cell cortex region                                                                                                                                                             | 4.76 |
| cell cortex                                                                                                                                                                    | 4.75 |
| negative regulation of digestive system process                                                                                                                                | 4.69 |
| response to follicle-stimulating hormone                                                                                                                                       | 4.62 |
| neurotransmitter biosynthetic process                                                                                                                                          | 4.62 |
| high-density lipoprotein particle remodeling                                                                                                                                   | 4.62 |
| FMN binding                                                                                                                                                                    | 4.6  |
| cholesterol transporter activity                                                                                                                                               | 4.6  |
| response to vitamin A                                                                                                                                                          | 4.56 |
| positive regulation of cardiac muscle cell differentiation                                                                                                                     | 4.56 |
| female genitalia development                                                                                                                                                   | 4.56 |
| reverse cholesterol transport                                                                                                                                                  | 4.5  |
| platelet formation                                                                                                                                                             | 4.44 |
| negative regulation of bone mineralization                                                                                                                                     | 4.44 |
| catecholamine biosynthetic process                                                                                                                                             | 4.44 |
| catechol-containing compound biosynthetic process                                                                                                                              | 4.44 |
| dipeptidase activity                                                                                                                                                           | 4.42 |
| platelet dense granule                                                                                                                                                         | 4.41 |
| cytoplasmic region                                                                                                                                                             | 4.39 |
| platelet morphogenesis                                                                                                                                                         | 4.38 |
| physiological muscle hypertrophy                                                                                                                                               | 4.38 |
| physiological cardiac muscle hypertrophy                                                                                                                                       | 4.38 |
| cell growth involved in cardiac muscle cell development                                                                                                                        | 4.38 |
| regulation of cholesterol efflux                                                                                                                                               | 4.33 |
| negative regulation of biomaterial tissue development                                                                                                                          | 4.33 |
| benzene-containing compound metabolic process                                                                                                                                  | 4.33 |
| steroid metabolic process                                                                                                                                                      | 4.32 |
| sterol transporter activity                                                                                                                                                    | 4.31 |
| steroid catabolic process                                                                                                                                                      | 4.29 |
| cellular biogenic amine biosynthetic process                                                                                                                                   | 4.29 |
| phosphatidylcholine binding                                                                                                                                                    | 4.26 |
| L-ascorbic acid binding                                                                                                                                                        | 4.26 |
| alcohol metabolic process                                                                                                                                                      | 4.26 |
| positive regulation of cardiocyte differentiation                                                                                                                              | 4.24 |
| male genitalia development                                                                                                                                                     | 4.24 |
| hypothalamus development                                                                                                                                                       | 4.24 |
| amine biosynthetic process                                                                                                                                                     | 4.24 |
| positive regulation of muscle hypertrophy                                                                                                                                      | 4.19 |
| positive regulation of cardiac muscle hypertrophy                                                                                                                              | 4.19 |
| cellular response to interleukin-6                                                                                                                                             | 4.19 |
| regulation of T cell migration                                                                                                                                                 | 4.15 |
| regulation of cardiac muscle cell differentiation                                                                                                                              | 4.15 |
| protein-lipid complex remodeling                                                                                                                                               | 4.15 |
| plasma lipoprotein particle remodeling                                                                                                                                         | 4.15 |
| macromolecular complex remodeling                                                                                                                                              | 4.15 |
| high-density lipoprotein particle                                                                                                                                              | 4.15 |
| oxidoreductase activity, acting on the CH-CH group of donors, NAD or NADP as acceptor                                                                                          | 4.13 |
| response to interleukin-6                                                                                                                                                      | 4.04 |
| response to gonadotropin                                                                                                                                                       | 4.04 |
| regulation of type 2 immune response                                                                                                                                           | 4.04 |
| liver regeneration                                                                                                                                                             | 4.04 |
| androgen metabolic process                                                                                                                                                     | 4.04 |
| secretory granule                                                                                                                                                              | 4.04 |
| reproductive behavior                                                                                                                                                          | 4.01 |
| positive regulation of cardiac muscle tissue growth                                                                                                                            | 4    |
| neurotransmitter metabolic process                                                                                                                                             | 4    |
| steroid dehydrogenase activity                                                                                                                                                 | 3.98 |
| multicellular organismal homeostasis                                                                                                                                           | 3.98 |
| response to amphetamine                                                                                                                                                        | 3.96 |
| regulation of macrophage derived foam cell differentiation                                                                                                                     | 3.96 |
| laminin binding                                                                                                                                                                | 3.94 |
| response to pain                                                                                                                                                               | 3.93 |
| response to iron ion                                                                                                                                                           | 3.93 |
| peptide catabolic process                                                                                                                                                      | 3.93 |
| killing of cells of other organism                                                                                                                                             | 3.93 |
| disruption of cells of other organism                                                                                                                                          | 3.93 |
| positive regulation of vasoconstriction                                                                                                                                        | 3.93 |
| positive regulation of heart growth                                                                                                                                            | 3.9  |
| intestinal absorption                                                                                                                                                          | 3.87 |
| dopamine metabolic process                                                                                                                                                     | 3.87 |
| organonitrogen compound catabolic process                                                                                                                                      | 3.87 |
| type 2 immune response                                                                                                                                                         | 3.85 |
| triglyceride homeostasis                                                                                                                                                       | 3.84 |
| regulation of digestive system process                                                                                                                                         | 3.84 |
| regulation of cardiocyte differentiation                                                                                                                                       | 3.84 |
| defense response to fungus                                                                                                                                                     | 3.84 |
| acylglycerol homeostasis                                                                                                                                                       | 3.84 |
| response to X-ray                                                                                                                                                              | 3.81 |
| plasma lipoprotein particle organization                                                                                                                                       | 3.81 |
| macrophage derived foam cell differentiation                                                                                                                                   | 3.81 |
| foam cell differentiation                                                                                                                                                      | 3.81 |
| fear response                                                                                                                                                                  | 3.81 |
| temperature homeostasis                                                                                                                                                        | 3.78 |
| leukocyte migration                                                                                                                                                            | 3.78 |
| plasma lipoprotein particle                                                                                                                                                    | 3.77 |
| lipoprotein particle                                                                                                                                                           | 3.77 |
| response to testosterone                                                                                                                                                       | 3.75 |
| regulation of cardiac muscle hypertrophy                                                                                                                                       | 3.75 |
| protein-lipid complex subunit organization                                                                                                                                     | 3.75 |
| T cell migration                                                                                                                                                               | 3.72 |
| positive regulation of cardiac muscle tissue development                                                                                                                       | 3.72 |
| activation of adenylate cyclase activity                                                                                                                                       | 3.72 |
| protein-lipid complex                                                                                                                                                          | 3.72 |
| regulation of sterol transport                                                                                                                                                 | 3.7  |
| regulation of muscle hypertrophy                                                                                                                                               | 3.7  |
| regulation of lymphocyte migration                                                                                                                                             | 3.7  |
| regulation of cholesterol transport                                                                                                                                            | 3.7  |
| phenol-containing compound biosynthetic process                                                                                                                                | 3.7  |
| response to nutrient levels                                                                                                                                                    | 3.65 |
| peroxisomal matrix                                                                                                                                                             | 3.65 |
| microbody lumen                                                                                                                                                                | 3.65 |
| cholesterol binding                                                                                                                                                            | 3.62 |
| negative regulation of cytokine-mediated signaling pathway                                                                                                                     | 3.62 |
| cholesterol efflux                                                                                                                                                             | 3.62 |
| blood vessel remodeling                                                                                                                                                        | 3.62 |
| response to amine                                                                                                                                                              | 3.6  |
| genitalia development                                                                                                                                                          | 3.6  |
| carboxypeptidase activity                                                                                                                                                      | 3.58 |
| positive regulation of organ growth                                                                                                                                            | 3.57 |
| organic hydroxy compound metabolic process                                                                                                                                     | 3.56 |
| intercalated disc                                                                                                                                                              | 3.56 |
| regulation of cardiac muscle tissue growth                                                                                                                                     | 3.55 |
| ammonium ion binding                                                                                                                                                           | 3.53 |
| visual learning                                                                                                                                                                | 3.53 |
| negative regulation of response to cytokine stimulus                                                                                                                           | 3.53 |
| sterol binding                                                                                                                                                                 | 3.51 |
| response to fungus                                                                                                                                                             | 3.51 |
| response to extracellular stimulus                                                                                                                                             | 3.51 |
| positive regulation of adenylate cyclase activity                                                                                                                              | 3.51 |
| response to radiation                                                                                                                                                          | 3.5  |
| secretory vesicle                                                                                                                                                              | 3.5  |
| acute-phase response                                                                                                                                                           | 3.49 |
| phospholipid transporter activity                                                                                                                                              | 3.47 |
| organic cyclic compound catabolic process                                                                                                                                      | 3.47 |
| cellular iron ion homeostasis                                                                                                                                                  | 3.47 |
| cellular biogenic amine metabolic process                                                                                                                                      | 3.47 |
| catecholamine metabolic process                                                                                                                                                | 3.47 |
| catechol-containing compound metabolic process                                                                                                                                 | 3.47 |
| visual behavior                                                                                                                                                                | 3.43 |
| regulation of heart growth                                                                                                                                                     | 3.43 |
| extracellular matrix binding                                                                                                                                                   | 3.39 |
| response to zinc ion                                                                                                                                                           | 3.39 |
| positive regulation of striated muscle cell differentiation                                                                                                                    | 3.39 |
| organic hydroxy compound catabolic process                                                                                                                                     | 3.37 |
| cortical actin cytoskeleton                                                                                                                                                    | 3.34 |
| cell-cell contact zone                                                                                                                                                         | 3.32 |
| regulation of plasma lipoprotein particle levels                                                                                                                               | 3.31 |
| copper ion binding                                                                                                                                                             | 3.29 |
| oxidoreductase activity, acting on the CH-CH group of donors                                                                                                                   | 3.28 |
| regulation of vasoconstriction                                                                                                                                                 | 3.28 |
| cellular response to ionizing radiation                                                                                                                                        | 3.28 |
| cardiac muscle cell development                                                                                                                                                | 3.28 |
| positive regulation of lyase activity                                                                                                                                          | 3.26 |
| positive regulation of cyclase activity                                                                                                                                        | 3.26 |
| regulation of cardiac muscle tissue development                                                                                                                                | 3.25 |
| positive regulation of striated muscle tissue development                                                                                                                      | 3.23 |
| positive regulation of muscle organ development                                                                                                                                | 3.23 |
| phospholipid transport                                                                                                                                                         | 3.23 |
| cardiac cell development                                                                                                                                                       | 3.23 |
| regulation of system process                                                                                                                                                   | 3.22 |
| metalloexopeptidase activity                                                                                                                                                   | 3.21 |
| regulation of muscle adaptation                                                                                                                                                | 3.21 |
| positive regulation of muscle tissue development                                                                                                                               | 3.21 |
| cardiac muscle hypertrophy                                                                                                                                                     | 3.21 |
| alcohol binding                                                                                                                                                                | 3.03 |
| secretory granule membrane                                                                                                                                                     | 3.01 |
| cortical cytoskeleton                                                                                                                                                          | 3.01 |
| vitamin binding                                                                                                                                                                | 2.94 |
| peroxisomal part                                                                                                                                                               | 2.92 |
| microbody part                                                                                                                                                                 | 2.92 |
| steroid binding                                                                                                                                                                | 2.85 |
| monooxygenase activity                                                                                                                                                         | 2.78 |

GO Terms  
■ CC  
■ BP  
■ MF

# EnrichmentGO

|                                                                                |      |
|--------------------------------------------------------------------------------|------|
| cell cortex part                                                               | 8.95 |
| response to iron ion starvation                                                | 7.93 |
| cell cortex                                                                    | 7.59 |
| response to bile acid                                                          | 7.52 |
| cellular response to bile acid                                                 | 7.52 |
| negative regulation of intestinal absorption                                   | 7.24 |
| cytoplasmic region                                                             | 7.21 |
| response to erythropoietin                                                     | 7.01 |
| interleukin-2 receptor binding                                                 | 6.99 |
| apical cortex                                                                  | 6.75 |
| positive regulation of cell growth involved in cardiac muscle cell development | 6.68 |
| regulation of intestinal absorption                                            | 6.43 |
| multicellular organismal iron ion homeostasis                                  | 6.43 |
| regulation of cell growth involved in cardiac muscle cell development          | 6.23 |
| cellular response to X-ray                                                     | 6.14 |
| adenylate cyclase binding                                                      | 6.12 |
| platelet dense granule lumen                                                   | 6.06 |
| cell cortex region                                                             | 6.06 |
| negative regulation of digestive system process                                | 5.98 |
| response to vitamin A                                                          | 5.85 |
| positive regulation of cardiac muscle cell differentiation                     | 5.85 |
| negative regulation of bone mineralization                                     | 5.73 |
| platelet dense granule                                                         | 5.7  |
| physiological muscle hypertrophy                                               | 5.68 |
| physiological cardiac muscle hypertrophy                                       | 5.68 |
| cell growth involved in cardiac muscle cell development                        | 5.68 |
| negative regulation of biomineral tissue development                           | 5.63 |
| positive regulation of cardiocyte differentiation                              | 5.53 |
| positive regulation of muscle hypertrophy                                      | 5.49 |
| positive regulation of cardiac muscle hypertrophy                              | 5.49 |
| cellular response to interleukin-6                                             | 5.49 |
| regulation of T cell migration                                                 | 5.45 |
| regulation of cardiac muscle cell differentiation                              | 5.45 |
| response to interleukin-6                                                      | 5.33 |
| regulation of type 2 immune response                                           | 5.33 |
| liver regeneration                                                             | 5.33 |
| positive regulation of cardiac muscle tissue growth                            | 5.29 |
| laminin binding                                                                | 5.24 |
| response to iron ion                                                           | 5.22 |
| killing of cells of other organism                                             | 5.22 |
| disruption of cells of other organism                                          | 5.22 |
| positive regulation of heart growth                                            | 5.16 |
| intestinal absorption                                                          | 5.16 |
| type 2 immune response                                                         | 5.13 |
| regulation of digestive system process                                         | 5.13 |
| regulation of cardiocyte differentiation                                       | 5.13 |
| defense response to fungus                                                     | 5.13 |
| response to X-ray                                                              | 5.1  |
| regulation of cardiac muscle hypertrophy                                       | 5.04 |
| T cell migration                                                               | 5.01 |
| positive regulation of cardiac muscle tissue development                       | 5.01 |
| activation of adenylate cyclase activity                                       | 4.99 |
| regulation of muscle hypertrophy                                               | 4.99 |
| regulation of lymphocyte migration                                             | 4.91 |
| negative regulation of cytokine-mediated signaling pathway                     | 4.86 |
| positive regulation of organ growth                                            | 4.86 |
| intercalated disc                                                              | 4.85 |
| regulation of cardiac muscle tissue growth                                     | 4.84 |
| negative regulation of response to cytokine stimulus                           | 4.82 |
| response to fungus                                                             | 4.8  |
| positive regulation of adenylate cyclase activity                              | 4.8  |
| acute-phase response                                                           | 4.78 |
| cellular iron ion homeostasis                                                  | 4.75 |
| regulation of heart growth                                                     | 4.71 |
| extracellular matrix binding                                                   | 4.67 |
| response to zinc ion                                                           | 4.67 |
| positive regulation of striated muscle cell differentiation                    | 4.67 |
| cortical actin cytoskeleton                                                    | 4.62 |
| cell-cell contact zone                                                         | 4.61 |
| cellular response to ionizing radiation                                        | 4.57 |
| cardiac muscle cell development                                                | 4.57 |
| positive regulation of lyase activity                                          | 4.55 |
| positive regulation of cyclase activity                                        | 4.55 |
| regulation of cardiac muscle tissue development                                | 4.53 |
| positive regulation of striated muscle tissue development                      | 4.52 |
| positive regulation of muscle organ development                                | 4.52 |
| cardiac cell development                                                       | 4.52 |
| regulation of muscle adaptation                                                | 4.5  |
| positive regulation of muscle tissue development                               | 4.5  |
| cardiac muscle hypertrophy                                                     | 4.5  |
| striated muscle hypertrophy                                                    | 4.47 |
| cardiac muscle tissue growth                                                   | 4.45 |
| muscle hypertrophy                                                             | 4.44 |
| positive regulation of endothelial cell proliferation                          | 4.42 |
| negative regulation of ossification                                            | 4.42 |
| regulation of bone mineralization                                              | 4.41 |
| regulation of adenylate cyclase activity                                       | 4.41 |
| iron ion homeostasis                                                           | 4.36 |
| animal organ regeneration                                                      | 4.36 |
| heart growth                                                                   | 4.35 |
| regulation of biomineral tissue development                                    | 4.3  |
| positive regulation of cAMP biosynthetic process                               | 4.3  |
| cortical cytoskeleton                                                          | 4.29 |
| muscle adaptation                                                              | 4.27 |
| regulation of organ growth                                                     | 4.25 |
| secretory granule lumen                                                        | 4.25 |
| lymphocyte migration                                                           | 4.23 |
| regulation of cyclase activity                                                 | 4.21 |
| positive regulation of cAMP metabolic process                                  | 4.21 |
| response to vitamin                                                            | 4.2  |
| regulation of striated muscle cell differentiation                             | 4.2  |
| regulation of lyase activity                                                   | 4.2  |
| positive regulation of muscle cell differentiation                             | 4.2  |
| digestive system process                                                       | 4.19 |
| cellular transition metal ion homeostasis                                      | 4.19 |
| cardiac muscle cell differentiation                                            | 4.11 |
| regulation of endothelial cell proliferation                                   | 4.1  |
| positive regulation of cyclic nucleotide biosynthetic process                  | 4.09 |
| cytoplasmic membrane-bounded vesicle lumen                                     | 4.05 |
| vesicle lumen                                                                  | 4.04 |
| positive regulation of purine nucleotide biosynthetic process                  | 4.03 |
| positive regulation of nucleotide biosynthetic process                         | 4.03 |
| bone mineralization                                                            | 4.03 |
| positive regulation of cyclic nucleotide metabolic process                     | 3.99 |
| cell killing                                                                   | 3.98 |
| platelet degranulation                                                         | 3.96 |
| modification of morphology or physiology of other organism                     | 3.95 |
| regulation of cAMP biosynthetic process                                        | 3.94 |
| endothelial cell proliferation                                                 | 3.94 |
| regulation of striated muscle tissue development                               | 3.92 |
| cAMP biosynthetic process                                                      | 3.91 |
| transition metal ion homeostasis                                               | 3.9  |
| regulation of muscle organ development                                         | 3.9  |
| cardiocyte differentiation                                                     | 3.9  |
| regulation of muscle tissue development                                        | 3.89 |
| protease binding                                                               | 3.87 |
| response to ethanol                                                            | 3.85 |
| positive regulation of angiogenesis                                            | 3.84 |
| hormone activity                                                               | 3.83 |
| liver development                                                              | 3.83 |
| response to transition metal nanoparticle                                      | 3.81 |
| regulation of cAMP metabolic process                                           | 3.8  |
| hepaticobiliary system development                                             | 3.8  |
| positive regulation of purine nucleotide metabolic process                     | 3.79 |
| positive regulation of nucleotide metabolic process                            | 3.79 |
| growth factor receptor binding                                                 | 3.77 |
| regulation of cyclic nucleotide biosynthetic process                           | 3.77 |
| striated muscle cell development                                               | 3.76 |
| biomineral tissue development                                                  | 3.76 |
| acute inflammatory response                                                    | 3.75 |
| regulation of purine nucleotide biosynthetic process                           | 3.73 |
| regulation of nucleotide biosynthetic process                                  | 3.72 |
| positive regulation of vasculature development                                 | 3.72 |
| regulation of cytokine-mediated signaling pathway                              | 3.69 |
| organ growth                                                                   | 3.69 |
| response to ionizing radiation                                                 | 3.68 |
| cAMP metabolic process                                                         | 3.68 |
| cyclic purine nucleotide metabolic process                                     | 3.67 |
| cyclic nucleotide biosynthetic process                                         | 3.66 |
| regulation of response to cytokine stimulus                                    | 3.65 |
| muscle cell development                                                        | 3.65 |
| cellular response to lipopolysaccharide                                        | 3.65 |
| regulation of leukocyte migration                                              | 3.64 |
| positive regulation of cell growth                                             | 3.63 |
| response to starvation                                                         | 3.62 |
| regulation of cyclic nucleotide metabolic process                              | 3.62 |
| response to alcohol                                                            | 3.61 |
| cellular response to molecule of bacterial origin                              | 3.61 |
| regulation of muscle cell differentiation                                      | 3.6  |
| positive regulation of epithelial cell proliferation                           | 3.6  |
| positive regulation of developmental growth                                    | 3.59 |
| regeneration                                                                   | 3.56 |
| digestion                                                                      | 3.56 |
| cellular response to acid chemical                                             | 3.56 |
| cellular response to radiation                                                 | 3.55 |
| establishment or maintenance of cell polarity                                  | 3.53 |
| response to nutrient                                                           | 3.52 |
| cellular response to biotic stimulus                                           | 3.49 |
| regulation of ossification                                                     | 3.46 |
| positive regulation of I-kappaB kinase/NF-kappaB signaling                     | 3.46 |
| protein C-terminus binding                                                     | 3.45 |
| cardiac muscle tissue development                                              | 3.44 |
| cyclic nucleotide metabolic process                                            | 3.42 |
| developmental cell growth                                                      | 3.4  |
| actin polymerization or depolymerization                                       | 3.4  |
| regulation of muscle system process                                            | 3.39 |
| regulation of purine nucleotide metabolic process                              | 3.34 |
| regulation of nucleotide metabolic process                                     | 3.31 |
| regulation of angiogenesis                                                     | 3.29 |
| striated muscle cell differentiation                                           | 3.19 |
| regulation of vasculature development                                          | 3.19 |
| regulation of I-kappaB kinase/NF-kappaB signaling                              | 3.19 |
| purine ribonucleotide biosynthetic process                                     | 3.19 |
| purine nucleotide biosynthetic process                                         | 3.17 |
| positive regulation of growth                                                  | 3.17 |
| negative regulation of peptidase activity                                      | 3.15 |
| ribonucleotide biosynthetic process                                            | 3.13 |
| purine-containing compound biosynthetic process                                | 3.13 |
| ribose phosphate biosynthetic process                                          | 3.12 |
| cellular response to tumor necrosis factor                                     | 3.12 |
| defense response to bacterium                                                  | 3.11 |
| I-kappaB kinase/NF-kappaB signaling                                            | 3.09 |
| response to acid chemical                                                      | 3.06 |
| response to tumor necrosis factor                                              | 3.05 |
| aging                                                                          | 3.05 |
| cytokine receptor binding                                                      | 3.03 |
| regulated exocytosis                                                           | 3.03 |
| cellular response to abiotic stimulus                                          | 3.01 |
| regulation of epithelial cell proliferation                                    | 3    |
| regulation of developmental growth                                             | 2.98 |
| response to metal ion                                                          | 2.95 |
| nucleotide biosynthetic process                                                | 2.95 |
| response to lipopolysaccharide                                                 | 2.94 |
| nucleoside phosphate biosynthetic process                                      | 2.94 |
| negative regulation of proteolysis                                             | 2.93 |
| response to molecule of bacterial origin                                       | 2.9  |
| apical part of cell                                                            | 2.89 |
| secretory granule                                                              | 2.87 |
| multicellular organismal homeostasis                                           | 2.86 |
| actin filament organization                                                    | 2.86 |
| striated muscle tissue development                                             | 2.85 |
| proteinaceous extracellular matrix                                             | 2.84 |
| epithelial cell proliferation                                                  | 2.83 |
| muscle tissue development                                                      | 2.81 |
| muscle organ development                                                       | 2.8  |
| muscle cell differentiation                                                    | 2.8  |
| ossification                                                                   | 2.76 |
| leukocyte migration                                                            | 2.75 |
| regulation of cell growth                                                      | 2.7  |
| regulation of peptidase activity                                               | 2.69 |
| muscle system process                                                          | 2.69 |
| response to nutrient levels                                                    | 2.68 |
| exocytosis                                                                     | 2.68 |
| negative regulation of hydrolase activity                                      | 2.67 |
| actin binding                                                                  | 2.66 |
| gland development                                                              | 2.64 |
| angiogenesis                                                                   | 2.63 |
| response to radiation                                                          | 2.61 |
| response to extracellular stimulus                                             | 2.61 |
| secretory vesicle                                                              | 2.61 |
| actin cytoskeleton                                                             | 2.61 |
| negative regulation of transport                                               | 2.58 |
| positive regulation of cell development                                        | 2.57 |
| response to inorganic substance                                                | 2.53 |
| defense response to other organism                                             | 2.49 |
| cellular metal ion homeostasis                                                 | 2.49 |
| cell growth                                                                    | 2.48 |
| cellular response to lipid                                                     | 2.46 |
| blood vessel morphogenesis                                                     | 2.46 |
| regulation of system process                                                   | 2.45 |
| purine ribonucleotide metabolic process                                        | 2.45 |
| heart development                                                              | 2.44 |
| cellular response to organic cyclic compound                                   | 2.44 |

**GO Terms**

- CC
- BP
- MF
