# Supplementary material for: Identification of key miRNAs in the progression of hepatocellular carcinoma using an integrated bioinformatics approach
Source: PubMed Central journal article supplement (PMC7210814; doi:10.7717/peerj.9000), 2020-05-06
Supplement: peerj-08-9000-s003.pdf [file peerj-08-9000-s003.pdf]

**Table S1:**  
**List of differentially expressed mRNAs**

CYP1A2  
MT1G  
HAMP  
MT1F  
CYP3A4  
FCN3  
MT1M  
MT1E  
MT1X  
CYP2C8  
ADH4  
APOF  
CYP2E1  
MT1A  
TAT  
CLEC1B  
ADH1B  
C9  
FOS  
HSD17B13  
ADH1C  
CYP2A6  
HGFAC  
AFM  
LCAT  
BBOX1  
SLC22A1  
CYP2C9  
BHMT  
SLCO1B3  
PCK1  
NAT2  
GBA3  
SLC10A1  
IGFALS  
NNMT  
GHR  
THRSP  
CYP8B1  
CLEC4G  
DNASE1L3  
HPD

F9  
UGT2B10  
CYP4A11  
GCGR  
MT2A  
C6  
PGLYRP2  
LY6E  
SDS  
SPP2  
FBP1  
HSD11B1  
CLRN3  
LECT2  
C8A  
SLC27A5  
PDK4  
MT1H  
FOSB  
ANXA10  
ALDOB  
APOA5  
SLC25A47  
SERPINA11  
SRD5A2  
GLYAT  
MBL2  
KBTBD11  
KLKB1  
SHBG  
BCHE  
HBA2  
ASPG  
PLGLB1  
CA2  
C3P1  
HSD17B6  
HPX  
HBB  
RND3  
ADH1A  
AQP9  
DBH  
AOX1

KMO  
PLG  
EVC2  
ASPDH  
CDHR2  
CPS1  
ADIRF  
C7  
CYP4V2  
CYP2A7  
TCIM  
CNDP1  
SOCS2  
HP  
MT1IP  
NPW  
ENO3  
TDO2  
CYR61  
G6PC  
EGR1  
FMO3  
ADH6  
CHST4  
SNORD13  
IGFBP1  
TMEM27  
SMIM24  
HAO2  
FTCD  
AKR7A3  
GSTA2  
DCN  
PON1  
MAT1A  
INMT  
DUSP1  
VIPR1  
GNMT  
CIDEB  
FETUB  
PHGDH  
ANG  
WDR72

RDH16  
CYP2J2  
IGFBP3  
OTC  
GATM  
C8B  
CMBL  
ACSL1  
SULT2A1  
SLC27A2  
AKR1D1  
CFHR3  
RIDA  
PROZ  
CYP39A1  
ACACB  
EPHX2  
AGXT2  
CAT  
RCL1  
GPT  
DCXR  
DPYS  
CFI  
HAO1  
HRG  
ALDH2  
ST3GAL6  
ACOT12  
TTR  
MARCO  
DEFB1  
PLIN2  
ALDH6A1  
PON3  
ACAA1  
CSRNP1  
FXD1  
APCS  
ALPL  
AQP7P3  
AGXT  
NDRG2  
OIT3

ETNPPL  
ALDH8A1  
OGDHL  
CETP  
PNPLA7  
LEAP2  
IDNK  
F12  
ALDH1L1  
ACSM2A  
C4BPA  
ORM2  
ZGPAT  
GLS2  
PZP  
NOCT  
ATOH8  
SLC39A5  
ASS1  
UGT2B7  
SLC38A4  
A2M  
SLC13A5  
HSD17B2  
ECM1  
ARG1  
GAGE6  
SLC12A9  
MCM5  
SELENOM  
HIST2H2AC  
AURKB  
RPS21  
ZNF544  
CDC45  
RBM34  
NPLOC4  
GMFB  
AGO2  
DARS2  
ACTN4  
SGCE  
ZNF581  
CHKA

TESC  
CLPTM1L  
TUBA1B  
CTNNA1  
DNAJC9  
HIST1H4C  
RANGAP1  
EEF1A2  
HSPH1  
RBM42  
VPS37C  
CHTOP  
STT3A  
PTPRF  
UBE2C  
NOL7  
NABP2  
UBE2Q2  
B4GALT3  
VAT1  
SQSTM1  
GTPBP4  
KPNB1  
NT5DC2  
ZYX  
CAPNS1  
PDXK  
RCC2  
IMPDH2  
H1FO  
ZC3H3  
WFS1  
CKS2  
ARL2  
FBL  
MTMR11  
COL15A1  
UCK2  
GNPDA1  
POLR2G  
MFSD10  
CREB3L2  
TMCO3  
TUBB2A

MPV17  
SNX27  
CS  
SMARCC1  
BLVRA  
PIGU  
TBCE  
SPNS1  
TK1  
TRRAP  
TOMM6  
TMEM147  
FAM20B  
TRNP1  
SEPT9  
ATIC  
NUP205  
PA2G4  
NCAPD2  
PALLD  
IRX3  
SLC50A1  
SF3A2  
TPR  
MARCKS  
TMED3  
POLR3C  
FKBP11  
PSMB4  
NUP37  
FAT1  
LASP1  
TUBB4B  
RGCC  
PARP12  
PHPT1  
HEATR1  
COPA  
TLCD1  
PITX1  
TUFT1  
FAM50A  
TUG1  
EFTUD2

MCM3  
DAP3  
POGK  
ZNF207  
LSM2  
GRAMD1A  
ATP6V1F  
NPC1  
HSPA1A  
PRPF3  
DLK1  
FBXL18  
TXNRD1  
LAGE3  
HKDC1  
CLDN15  
FDPS  
NUPR1  
BAIAP2L1  
HCFC1  
CKAP2L  
TMEM9  
PYGB  
GNPAT  
MED20  
SCAMP3  
AP3B1  
TUBA1A  
H2AFZ  
CLCN7  
NDUFA4L2  
AFP  
NUSAP1  
SERPINE2  
NAXE  
PLVAP  
COL1A2  
CFL1  
ANXA2  
RUSC1  
CDK4  
UQCC2  
CPD  
WASHC5



KIFC1  
GMNN  
MEP1A  
KRTCAP2  
GCNT3  
MCM2  
MID1IP1  
NCSTN  
HSPA1B  
CDCA5  
MFGE8  
CNOT11  
NSMCE2  
C8orf33  
PUF60  
LYZ  
CD24  
EPRS  
MMP9  
DNAJB11  
RAP2A  
GLA  
SNHG6  
SLC52A2  
SSR2  
IRAK1  
SAC3D1  
SMYD3  
MRGBP  
GARS  
ARHGEF2  
ACLY  
LOXL4  
CTSA  
SLC39A1  
MANF  
LSM4  
CCT3  
SLC25A39  
PLOD3  
SRXN1  
TEAD2  
ATP6AP1  
CSTB

ACTA2  
CDC25B  
PARP1  
TMEM106C  
MCM6  
SMG5  
SNRPB  
BAIAP2L2  
ALG1L  
GBA  
PSMD4  
CNIH4  
LMNA  
PIK3R2  
SAE1  
COX7B2  
FASN  
CKAP4  
SIPA1L2  
VWF  
NEU1  
FAM83H  
HSPB1  
DNMT1  
GLMP  
ILF2  
PTTG1  
TUBA1C  
COL5A2  
HGS  
HSP90AB1  
MUC13  
PTTG3P  
RRAGD  
SPP1  
BRSK1  
TOMM40L  
CDKN3  
S100A10  
AURKA  
TMEM45B  
PEA15  
TFRC  
GBP2

SQLE  
ASPM  
NCAPG  
LAPTM4B  
TKT  
CCNB2  
COL1A1  
LCN2  
ACTG2  
PAFAH1B3  
AKR1C3  
SF3B4  
DDX39A  
LAMC1  
FADS1  
PRC1  
S100P  
THY1  
UBD  
COL4A1  
CAP2  
CDC20  
CCL20  
TOP2A  
AKR1B10  
GPC3  
SPINK1

**Differentially expressed miRNAs**

hsa-miR-224  
hsa-miR-10b  
hsa-miR-221  
solexa-8211-102  
hsa-miR-222  
hsa-miR-182  
hsa-miR-183  
hsa-miR-106b  
hsa-miR-93  
hsa-miR-135a  
hsa-miR-18a  
hsa-miR-452\*:9.1  
hsa-miR-96  
hsa-miR-500  
hsa-miR-452

hsa-miR-324-5p  
hsa-miR-551b  
hsa-miR-877  
hsa-miR-501-5p  
hsa-miR-886-5p  
hsa-miR-106b\*  
hsa-miR-454\*  
hsa-miR-17-5p:9.1  
hsa-miR-1180  
hsa-miR-1303  
hsa-miR-339-3p  
hsa-miR-34b\*  
hsa-miR-7-2\*  
hsa-miR-934  
hsa-miR-499-3p  
hsa-miR-1827  
HS\_151.1  
hsa-miR-545  
hsa-miR-873  
HS\_267  
HS\_220  
hsa-miR-558  
hsa-miR-548k  
HS\_130  
hsa-miR-569  
hsa-miR-488  
hsa-miR-921  
hsa-miR-133b  
hsa-let-7c\*  
hsa-miR-490-3p  
HS\_89  
hsa-miR-586  
HS\_43.1  
HS\_30  
hsa-miR-1256  
hsa-miR-936  
hsa-miR-490-5p  
hsa-miR-541\*  
hsa-miR-1258  
HS\_144  
hsa-miR-600  
hsa-miR-545\*  
HS\_62  
HS\_122.1

hsa-miR-657  
hsa-miR-1208  
hsa-miR-1324  
hsa-miR-1282  
hsa-miR-578  
hsa-miR-933  
HS\_84  
hsa-miR-548p  
hsa-miR-384  
HS\_133.1  
hsa-miR-1179  
hsa-miR-100\*  
hsa-miR-1297  
hsa-miR-302d  
hsa-miR-559  
hsa-miR-576-3p  
hsa-miR-1226\*  
HS\_251.1  
hsa-miR-187\*  
HS\_65  
hsa-miR-602  
hsa-miR-542-5p  
hsa-miR-554  
HS\_153  
HS\_90  
hsa-let-7e\*  
hsa-miR-138  
hsa-miR-1294  
hsa-miR-30c-2\*  
HS\_262.1  
hsa-miR-19b-2\*  
hsa-miR-573  
hsa-miR-219-5p  
hsa-miR-101\*  
HS\_199  
HS\_93  
hsa-miR-1184  
hsa-miR-125a-3p  
HS\_252.1  
hsa-miR-641  
hsa-miR-1272  
hsa-miR-23a\*  
hsa-miR-99a\*  
hsa-miR-924

hsa-miR-223\*  
hsa-miR-1299  
hsa-miR-367\*  
hsa-miR-27a\*  
hsa-miR-133a  
HS\_203  
hsa-miR-195\*  
hsa-miR-1468  
hsa-miR-298  
hsa-miR-610  
hsa-miR-1  
hsa-miR-372  
hsa-miR-502-5p  
hsa-miR-1207-5p  
hsa-miR-609  
hsa-miR-592  
hsa-miR-890  
HS\_113  
hsa-miR-144:9.1  
HS\_114  
HS\_176  
hsa-miR-651  
hsa-miR-424\*  
hsa-miR-1284  
hsa-miR-181a\*  
hsa-miR-326  
hsa-miR-24-1\*  
hsa-miR-144  
hsa-miR-192\*  
HS\_268  
HS\_71.1  
hsa-miR-1254  
HS\_38.1  
hsa-miR-193b\*  
HS\_81  
hsa-miR-26a-2\*  
HS\_150  
HS\_97  
hsa-miR-582-5p  
hsa-miR-551a  
hsa-miR-125b-2\*  
HS\_244  
hsa-miR-17\*  
hsa-miR-29b-1\*

HS\_139  
HS\_152  
hsa-miR-139-3p  
HS\_32  
hsa-miR-10a\*  
hsa-let-7a\*  
hsa-miR-1247  
hsa-miR-940  
hsa-miR-374a\*  
hsa-miR-548b-5p  
HS\_275  
hsa-miR-181a-2\*  
hsa-miR-335\*  
hsa-miR-455-5p  
hsa-miR-143\*  
hsa-miR-26b\*  
HS\_209.1  
hsa-miR-214\*  
hsa-miR-203  
hsa-miR-624\*  
HS\_239  
hsa-miR-378\*  
hsa-miR-511  
hsa-let-7b\*  
hsa-miR-542-3p  
hsa-miR-148a  
hsa-miR-615-3p  
hsa-miR-194\*  
hsa-miR-189:9.1  
hsa-miR-129-5p  
hsa-miR-450b-5p  
hsa-miR-340  
hsa-miR-29c\*  
hsa-miR-22\*  
hsa-miR-144\*  
solexa-9029-92  
hsa-miR-204  
hsa-miR-126  
hsa-miR-497  
hsa-miR-576-5p  
hsa-miR-145  
hsa-miR-499-5p  
hsa-miR-145\*  
hsa-miR-130a

hsa-miR-450a  
hsa-miR-22  
hsa-miR-29c  
hsa-miR-335  
hsa-miR-505  
hsa-miR-30a  
hsa-miR-30e  
hsa-miR-486-5p  
hsa-miR-30a\*  
hsa-miR-101  
hsa-let-7c  
hsa-miR-451  
hsa-miR-125b  
hsa-miR-378  
hsa-miR-195  
hsa-miR-424  
hsa-miR-10a  
hsa-miR-122\*  
hsa-miR-100  
hsa-miR-214  
hsa-miR-139-5p  
hsa-miR-99a  
hsa-miR-199a-5p  
hsa-miR-199a\*:9.1
