# Supplementary material for: Identification of key miRNAs in the progression of hepatocellular carcinoma using an integrated bioinformatics approach
Source: PubMed Central journal article supplement (PMC7210814; doi:10.7717/peerj.9000), 2020-05-06
Supplement: peerj-08-9000-s004.pdf [file peerj-08-9000-s004.pdf]

**Table S2:**  
**Genes in ME**

HAMP

FCN3

CLEC1B

LCAT

IGFALS

CLEC4G

DNASE1L3

SLC25A47

SRD5A2

KBTBD11

RND3

DBH

CDHR2

TCIM

CNDP1

CHST4

TMEM27

HAO2

DCN

INMT

VIPR1

CYP39A1

ST3GAL6

MARCO

OIT3

CETP

ZGPAT

ATOH8

ECM1

AKR1C3

UBD

CAP2

GPC3
