# Supplementary material for: Identification of key miRNAs in the progression of hepatocellular carcinoma using an integrated bioinformatics approach
Source: PubMed Central journal article supplement (PMC7210814; doi:10.7717/peerj.9000), 2020-05-06
Supplement: peerj-08-9000-s005.pdf [file peerj-08-9000-s005.pdf]

**Table S3:**  
**mRNAs binding TFs (from JASPAR)**

---

RUNX1  
TFAP2A  
NR2F1  
CREB1  
E2F1  
NFIL3  
ELK1  
FOXF2  
FOXD1  
FOXC1  
FOXL1  
GATA2  
GATA3  
FOXI1  
HLF  
NHLH1  
IRF1  
IRF2  
MEF2A  
MZF1\_1-4  
MZF1\_5-13  
MAX  
MYC::MAX  
GABPA  
PPARG::RXRA  
PPARG  
Pax6  
PBX1  
RORA\_1  
RORA\_2  
RREB1  
RXRA::VDR  
ELK4  
SOX9  
SP1  
SPI1  
SPIB  
SRF  
SRY  
TEAD1  
TAL1::TCF3  
USF1

YY1  
ETS1  
REL  
NFKB1  
TP53  
RELA  
NR1H2::RXRA  
TLX1::NFIC  
NKX3-1  
ZNF354C  
HINFP  
BRCA1  
STAT1  
REST  
CTCF  
FOXA1  
EWSR1-FLI1  
REST  
STAT1  
ESR1  
NFE2L2  
INSM1  
RXR::RAR\_DR5  
NFIC  
PLAG1  
SPI1  
ESR2  
FOXA1  
BATF::JUN  
CDX2  
CEBPB  
DUX4  
E2F4  
E2F6  
ELF1  
FLI1  
FOS  
FOSL1  
FOSL2  
FOXH1  
FOXP1  
HNF4G  
HSF1  
JUN

JUN (var.2)  
JUNB  
JUND  
JUND (var.2)  
MAFF  
MAFK  
MEF2C  
NFE2::MAF  
NFYB  
NR2C2  
NRF1  
POU2F2  
PRDM1  
RFX5  
RUNX2  
SMAD2::SMAD3::SMAD4  
SP2  
STAT2::STAT1  
TCF7L2  
TFAP2C  
TP63  
USF2  
ZBTB33  
ZNF263  
AR  
CEBPA  
E2F1  
EBF1  
EGR1  
ELK4  
ESR2  
FOXA1  
GATA2  
GATA3  
HNF4A  
IRF1  
MAX  
MEF2A  
NFKB1  
NFYA  
PAX5  
SP1  
SRF  
STAT1

STAT3  
TAL1::GATA1  
TFAP2A  
TP53  
USF1  
YY1  
ZEB1  
ESRRA  
FOXP2  
SREBF1  
SREBF2  
THAP1  
EHF  
KLF5  
RFX2
