# Supplementary material for: Identification of key miRNAs in the progression of hepatocellular carcinoma using an integrated bioinformatics approach
Source: PubMed Central journal article supplement (PMC7210814; doi:10.7717/peerj.9000), 2020-05-06
Supplement: peerj-08-9000-s006.pdf [file peerj-08-9000-s006.pdf]

**Table S4:**  
**TOP 5% mRNA-TF pairs**

| <b>mRNA</b> | <b>TF</b>    |
|-------------|--------------|
| VIPR1       | ZNF263       |
| DBH         | ZNF263       |
| DCN         | ZNF263       |
| INMT        | PPARG        |
| CAP2        | ZNF263       |
| DBH         | EWSR1-FLI1   |
| VIPR1       | IRF1         |
| ST3GAL6     | MEF2C        |
| FCN3        | STAT2::STAT1 |
| RND3        | ZNF263       |
| CHST4       | TLX1::NFIC   |
| DCN         | IRF1         |
| ECM1        | SP2          |
| FCN3        | IRF1         |
| HAO2        | MAFF         |
| HAO2        | HSF1         |
| ST3GAL6     | MEF2A        |
| KBTBD11     | PRDM1        |
| ST3GAL6     | ZNF263       |
| KBTBD11     | IRF1         |
| MARCO       | PRDM1        |
| ST3GAL6     | EWSR1-FLI1   |
| HAO2        | CTCF         |
| LCAT        | RREB1        |
| CYP39A1     | RFX2         |
| DCN         | EWSR1-FLI1   |
| FCN3        | STAT1        |
| SLC25A47    | MEF2A        |
| DNASE1L3    | FOXP1        |
| IGFALS      | SP2          |
| HAO2        | MAFK         |
| VIPR1       | SP2          |
| AKR1C3      | MAFF         |
| CNDP1       | EGR1         |
| GPC3        | PLAG1        |
| MARCO       | ESRRA        |
| CDHR2       | ESRRA        |
| GPC3        | NFYA         |
| UBD         | HNF4A        |
| IGFALS      | SP1          |
| CETP        | HSF1         |

|          |              |
|----------|--------------|
| CETP     | REST         |
| CDHR2    | FOXP1        |
| KBTBD11  | NRF1         |
| GPC3     | SP2          |
| DCN      | SRF          |
| UBD      | NFKB1        |
| CETP     | MEF2A        |
| CDHR2    | ZNF263       |
| LCAT     | RFX2         |
| SLC25A47 | NR2C2        |
| VIPR1    | ELF1         |
| RND3     | FOXP1        |
| UBD      | HNF4G        |
| RND3     | TP63         |
| OIT3     | IRF1         |
| ATOH8    | HNF4A        |
| ATOH8    | ZNF263       |
| CLEC1B   | ZNF263       |
| FCN3     | PRDM1        |
| CDHR2    | EBF1         |
| CLEC1B   | GATA2        |
| UBD      | RELA         |
| IGFALS   | TEAD1        |
| ST3GAL6  | PAX5         |
| CDHR2    | STAT3        |
| ATOH8    | HNF4G        |
| VIPR1    | RFX5         |
| INMT     | ESR2         |
| DCN      | PRDM1        |
| AKR1C3   | MAFK         |
| OIT3     | TAL1::GATA1  |
| CYP39A1  | STAT2::STAT1 |
| KBTBD11  | SP2          |
| AKR1C3   | JUND (var.2) |
| CHST4    | TEAD1        |
| KBTBD11  | EGR1         |
| RND3     | FOXP2        |
| DNASE1L3 | FOXP2        |
| INMT     | FOXP2        |
| CETP     | TAL1::GATA1  |
| INMT     | NFKB1        |
| DNASE1L3 | FOXA1        |
| ZGPAT    | SREBF2       |
| DNASE1L3 | IRF1         |

|         |              |
|---------|--------------|
| AKR1C3  | TCF7L2       |
| UBD     | NR2C2        |
| KBTBD11 | TAL1::TCF3   |
| CETP    | MEF2C        |
| INMT    | FOXA1        |
| CYP39A1 | SP2          |
| CDHR2   | RREB1        |
| CHST4   | EGR1         |
| CDHR2   | CDX2         |
| ST3GAL6 | CEBPA        |
| INMT    | HNF4A        |
| ZGPAT   | ZNF263       |
| MARCO   | FLI1         |
| SRD5A2  | RREB1        |
| CHST4   | GATA2        |
| VIPR1   | EBF1         |
| CETP    | SP2          |
| KBTBD11 | FOXP1        |
| SRD5A2  | PRDM1        |
| INMT    | FOXP1        |
| ECM1    | TFAP2C       |
| LCAT    | EGR1         |
| CLEC4G  | HSF1         |
| UBD     | TFAP2A       |
| INMT    | FOXH1        |
| ZGPAT   | SREBF1       |
| ATOH8   | NR2F1        |
| UBD     | STAT1        |
| CHST4   | IRF1         |
| CDHR2   | STAT1        |
| OIT3    | FOXP1        |
| ZGPAT   | STAT2::STAT1 |
| CLEC4G  | NFYB         |
| OIT3    | STAT1        |
| ZGPAT   | IRF1         |
| ZGPAT   | SP2          |
| ZGPAT   | NFKB1        |
| VIPR1   | IRF2         |
| KBTBD11 | FLI1         |
| CYP39A1 | EGR1         |
| GPC3    | NR2C2        |
| DCN     | STAT3        |
| ECM1    | SP1          |
| VIPR1   | SP1          |

|          |            |
|----------|------------|
| CLEC4G   | FOXP1      |
| GPC3     | ZNF263     |
| GPC3     | INSM1      |
| UBD      | TFAP2C     |
| DCN      | FOXP2      |
| HAMP     | SP1        |
| CLEC4G   | RORA_1     |
| VIPR1    | YY1        |
| ST3GAL6  | E2F6       |
| TCIM     | IRF1       |
| CYP39A1  | SP1        |
| ST3GAL6  | NFE2L2     |
| SLC25A47 | SP1        |
| ZGPAT    | SP1        |
| VIPR1    | EWSR1-FLI1 |
| HAMP     | PAX5       |
| KBTBD11  | RFX5       |
| LCAT     | SP2        |
| CLEC1B   | STAT1      |
| ZGPAT    | RELA       |
| ST3GAL6  | ESR1       |
| DNASE1L3 | DUX4       |
| VIPR1    | TLX1::NFIC |
| SLC25A47 | E2F4       |
| MARCO    | TP53       |
| SRD5A2   | ZNF263     |
| GPC3     | IRF1       |
| FCN3     | EBF1       |
| IGFALS   | KLF5       |
| VIPR1    | KLF5       |
| GPC3     | KLF5       |
| LCAT     | CTCF       |
| CDHR2    | NR2C2      |
| CLEC4G   | TFAP2C     |
| ATOX8    | ESRRA      |
| LCAT     | KLF5       |
| HAMP     | KLF5       |
| CDHR2    | ESR1       |
| VIPR1    | EGR1       |
| SLC25A47 | USF1       |
| CNDP1    | USF1       |
| DNASE1L3 | CEBPB      |
| KBTBD11  | CEBPB      |
| OIT3     | CDX2       |

|          |                     |
|----------|---------------------|
| MARCO    | YY1                 |
| IGFALS   | EGR1                |
| ATOH8    | RREB1               |
| ST3GAL6  | STAT3               |
| CAP2     | STAT1               |
| DCN      | FOSL2               |
| IGFALS   | PLAG1               |
| ST3GAL6  | E2F1                |
| DCN      | FOXP1               |
| SRD5A2   | AR                  |
| VIPR1    | FLI1                |
| ZGPAT    | ESRRA               |
| LCAT     | BATF::JUN           |
| ZGPAT    | MAFF                |
| AKR1C3   | USF2                |
| ST3GAL6  | FOS                 |
| LCAT     | PLAG1               |
| LCAT     | FOS                 |
| INMT     | MEF2C               |
| ST3GAL6  | E2F4                |
| CDHR2    | FOXP2               |
| CLEC4G   | FOXP2               |
| CHST4    | PRDM1               |
| SLC25A47 | E2F1                |
| MARCO    | ELF1                |
| CYP39A1  | NFYB                |
| CHST4    | ZNF263              |
| VIPR1    | DUX4                |
| DCN      | JUNB                |
| CYP39A1  | NFYA                |
| INMT     | NFYB                |
| ST3GAL6  | FOXI1               |
| CLEC4G   | SMAD2::SMAD3::SMAD4 |
| DCN      | FOXI1               |
| CNDP1    | HSF1                |
| ATOH8    | SP1                 |
| LCAT     | FOSL2               |
| INMT     | RELA                |
| DCN      | FOSL1               |
| IGFALS   | FOXA1               |
| UBD      | MAFK                |
| DCN      | JUN (var.2)         |
| CNDP1    | ZNF263              |
| ATOH8    | PRDM1               |

|          |              |
|----------|--------------|
| ATOH8    | ZEB1         |
| KBTBD11  | ZEB1         |
| DBH      | ZEB1         |
| DCN      | ZEB1         |
| IGFALS   | ZEB1         |
| ATOH8    | E2F4         |
| GPC3     | E2F4         |
| MARCO    | ZNF263       |
| FCN3     | FOXP1        |
| UBD      | PRDM1        |
| AKR1C3   | FOXP1        |
| DNASE1L3 | MAX          |
| SLC25A47 | E2F6         |
| IGFALS   | ESR1         |
| CLEC1B   | CDX2         |
| RND3     | FOXA1        |
| CLEC4G   | NFYA         |
| CDHR2    | SP2          |
| ST3GAL6  | CEBPB        |
| HAO2     | SP1          |
| CLEC4G   | STAT1        |
| DCN      | BATF::JUN    |
| AKR1C3   | IRF1         |
| UBD      | USF2         |
| AKR1C3   | TAL1::TCF3   |
| FCN3     | CTCF         |
| CLEC4G   | ZBTB33       |
| CDHR2    | RXR::RAR_DR5 |
| OIT3     | FOXJ1        |
| CDHR2    | ESR2         |
| ST3GAL6  | MAFF         |
| CLEC1B   | TEAD1        |
| CHST4    | TFAP2A       |
| DCN      | JUND (var.2) |
| CYP39A1  | FOXF2        |
| MARCO    | IRF1         |
| DBH      | KLF5         |
| SLC25A47 | KLF5         |
| ZGPAT    | KLF5         |
