# Supplementary material for: Identification of key miRNAs in the progression of hepatocellular carcinoma using an integrated bioinformatics approach
Source: PubMed Central journal article supplement (PMC7210814; doi:10.7717/peerj.9000), 2020-05-06
Supplement: peerj-08-9000-s007.pdf [file peerj-08-9000-s007.pdf]

**Table S5:**  
**Top 100 miRNA-TF pairs**

| <b>TF</b>  | <b>miRNA</b>   |
|------------|----------------|
| AML1       | hsa-miR-148a   |
| AML1       | hsa-miR-302d   |
| ATF6       | hsa-miR-214    |
| C-REL      | hsa-miR-1      |
| C-REL      | hsa-miR-133a   |
| CHOP-      |                |
| C/EBPALPHA | hsa-miR-130a   |
| CdxA       | hsa-miR-101    |
| CdxA       | hsa-miR-125b   |
| EGR        | hsa-miR-93     |
| EGR        | hsa-miR-106b   |
| ELF-1      | hsa-miR-133b   |
| ELF-1      | hsa-miR-214    |
| ER         | hsa-miR-1      |
| ER         | hsa-miR-101    |
| ER         | hsa-miR-96     |
| ER         | hsa-miR-144    |
| ER         | hsa-miR-183    |
| ER         | hsa-miR-133a   |
| ER         | hsa-miR-182    |
| ER         | hsa-miR-130a   |
| ETS        | hsa-miR-214    |
| FREAC-4    | hsa-miR-214    |
| GABP       | hsa-miR-130a   |
| HIF-1      | hsa-miR-214    |
| HNF-1      | hsa-miR-144    |
| HNF-3      | hsa-miR-135a   |
| HOXA7      | hsa-miR-96     |
| HOXA7      | hsa-miR-183    |
| HOXA7      | hsa-miR-182    |
| HSF2       | hsa-miR-148a   |
| IRF        | hsa-miR-101    |
| LEF1       | hsa-miR-135a   |
| LEF1       | hsa-miR-138    |
| MEF-2      | hsa-miR-1      |
| MEIS1      | hsa-miR-101    |
| MEIS1      | hsa-miR-125b   |
| MEIS1      | hsa-miR-214    |
| NCX        | hsa-miR-101    |
| NCX        | hsa-miR-542-3p |
| NCX        | hsa-miR-125b   |

|           |                |
|-----------|----------------|
| NF-AT     | hsa-miR-148a   |
| NF-Y      | hsa-miR-138    |
| NF-Y      | hsa-miR-93     |
| NF-Y      | hsa-miR-125b   |
| NF-Y      | hsa-miR-106b   |
| OCTAMER   | hsa-miR-125b   |
| PAX-4     | hsa-miR-148a   |
| PAX-4     | hsa-miR-125b   |
| PEA3      | hsa-miR-497    |
| PEA3      | hsa-miR-195    |
| PEA3      | hsa-miR-214    |
| POU3F2    | hsa-miR-101    |
| RFX       | hsa-miR-148a   |
| RORALPHA2 | hsa-miR-133a   |
| SF-1      | hsa-miR-133a   |
| SOX-5     | hsa-miR-302d   |
| SOX-5     | hsa-miR-138    |
| SOX-5     | hsa-miR-125b   |
| SP-1      | hsa-miR-542-3p |
| SRF       | hsa-miR-93     |
| SRF       | hsa-miR-214    |
| SRF       | hsa-miR-125b   |
| SRF       | hsa-miR-106b   |
| SRY       | hsa-miR-222    |
| SRY       | hsa-miR-221    |
| STAT1     | hsa-miR-130a   |
| TEF       | hsa-miR-10a    |
| YY1       | hsa-miR-148a   |
| YY1       | hsa-miR-101    |
| YY1       | hsa-miR-497    |
| YY1       | hsa-miR-195    |
| YY1       | hsa-miR-125b   |
| C-REL     | hsa-miR-203    |
| CHX10     | hsa-miR-125b   |
| CdxA      | hsa-miR-100    |
| EGR       | hsa-miR-203    |
| HOXA4     | hsa-miR-125b   |
| IRF-7     | hsa-miR-133b   |
| IRF       | hsa-miR-203    |
| IRF       | hsa-miR-125b   |
| IRF       | hsa-miR-100    |
| LEF1      | hsa-miR-126    |
| LEF1      | hsa-miR-203    |
| LEF1      | hsa-miR-10a    |

|           |              |
|-----------|--------------|
| MEF-2     | hsa-miR-133a |
| MEIS1     | hsa-miR-99a  |
| MEIS1     | hsa-miR-100  |
| MYOD      | hsa-miR-203  |
| NF-Y      | hsa-miR-99a  |
| NKX2-5    | hsa-miR-505  |
| PBX-1     | hsa-miR-135a |
| PEA3      | hsa-miR-133b |
| RORALPHA2 | hsa-miR-125b |
| SOX-5     | hsa-miR-133b |
| SOX-5     | hsa-miR-100  |
| SRF       | hsa-miR-100  |
| T3R       | hsa-miR-505  |
| TCF-4     | hsa-miR-126  |
| TCF-4     | hsa-miR-10a  |
| YY1       | hsa-miR-100  |
